# Supplementary material for: Circulating miR-1246 and miR-485-3p as Promising Biomarkers of Clinical Response and Outcome in Melanoma Patients Treated with Targeted Therapy
Source: Cancers (Basel). 2022 Jul 29;14(15):3706. doi: 10.3390/cancers14153706 (PMC9367338; doi:10.3390/cancers14153706)
Supplement: Supplementary file 1 [file cancers-14-03706-s001.zip › Levati et al revised manuscript-Table S2.xls]

## Sheet: Expression_table
Table S2. miRNA expression in plasma samples collected before the start of therapy (T0) and at progression in melanoma patients treated with BRAFi and MEKi
MiRNA profiling was performed by small RNA-seq
Expression values are normalized and log2-transformed
FeatureID	Case1-T0	Case6-T0	Case7-T0	Case8-T0	Case9-T0	Case10-T0	Case11-T0	Case12-T0	Case16-T0	Case17-T0	Case18-T0	Case19-T0	Case2-T0	Case20-T0	Case21-T0	Case22-T0	Case24-T0	Case25-T0	Case28-T0	Case29-T0	Case3-T0	Case30-T0	Case31-TO	Case33-T0	Case4-T0	Case5-T0	Case13-T0	Case14-T0	Case23-T0	Case26-T0	Case27-T0	Case1-TP	Case6-TP	Case7-TP	Case8-TP	Case9-TP	Case10-TP	Case12-TP	Case15-TP	Case16-TP	Case18-TP	Case19-TP	Case2-TP	Case20-TP	Case21-TP	Case22-TP	Case24-TP	Case28-TP	Case29-TP
hsa-let-7a-3p	5.99123	4.6152	5.54624	4.68356	4.56906	4.65698	5.82874	5.23761	5.53023	5.69491	5.56368	4.19189	4.88578	3.87045	4.23662	3.73259	4.67821	5.1968	5.25761	5.89084	5.9528	5.75364	5.91127	5.6635	4.26305	4.47333	3.59984	5.35037	4.9741	6.44492	5.83421	5.21888	3.76911	5.56192	4.71012	4.4696	3.13972	4.50828	5.12756	5.25932	5.97079	4.40066	5.39702	4.0558	3.70919	4.11326	0	4.54894	4.84281
hsa-let-7b-3p	6.05971	4.97777	5.62532	4.46117	6.25187	4.32356	4.90891	6.39988	5.9932	6.06757	5.70118	4.95743	5.88578	3.98008	4.35691	5.19202	4.16801	5.01497	4.70239	5.4758	4.78287	6.37031	7.06221	6.04832	4.97926	5.62219	3.72537	5.41964	4.57982	0	7.12967	5.92249	4.35407	5.99582	4.58982	5.10703	5.13972	6.17125	5.65957	5.80294	6.1228	5.98562	5.54902	4.14327	3.70919	3.59869	5.47015	5.10353	4.13232
hsa-let-7b-5p	12.2975	13.2503	12.4457	11.9623	12.9266	12.8969	11.7766	12.222	11.5607	12.5588	11.8314	13.6699	13.0873	13.5194	13.3845	14.168	13.947	12.5697	14.1851	13.1334	13.032	13.8663	11.8231	11.2929	13.0957	12.6813	12.9235	12.5768	13.564	12.1553	11.5952	11.8489	13.5738	11.9823	12.9911	13.509	13.3457	12.2962	12.6025	11.8475	12.4897	13.1198	12.8439	13.3888	12.7823	13.6286	13.1754	13.0482	12.4887
hsa-let-7d-3p	10.4086	10.4908	10.8616	10.8099	10.2548	9.86953	10.6486	10.4265	10.7029	10.5576	10.4625	10.3284	10.5793	9.45066	9.88923	10.4916	10.1495	10.4231	10.1698	9.73633	10.6726	9.9863	10.6662	10.1545	10.4753	10.3281	10.2179	10.5946	10.3879	10.7982	10.9597	10.5127	10.5329	10.4654	10.6662	9.65635	10.0397	10.4586	10.2529	10.528	10.0456	10.1479	10.7402	9.82977	9.37595	9.81093	10.0435	10.3897	10.0907
hsa-let-7d-5p	11.6633	12.2693	12.1261	11.6227	12.5574	12.0422	11.4829	11.471	11.7756	11.9117	11.1183	12.656	12.0189	12.6996	13.0705	12.8525	13.5133	12.648	12.5061	11.2702	11.9061	11.74	10.9602	11.3961	12.3437	12.1365	12.2616	11.9417	12.2685	10.9534	10.8239	11.8372	12.8212	11.3961	11.9974	12.4776	12.0354	11.439	11.9121	11.709	11.0054	11.5166	12.3326	12.6637	11.5165	12.0511	11.8525	11.9976	11.6658
hsa-let-7e-5p	11.7142	12.7147	12.3161	12.7906	12.6346	11.2172	11.4384	11.6193	10.5137	11.6415	11.7249	12.7847	10.8858	12.5371	12.3384	13.2906	13.141	11.8921	12.8675	11.9623	11.7131	11.9592	10.2129	11.1263	12.0293	11.7587	12.0318	11.8245	12.9307	13.2803	9.79684	11.8638	13.2306	11.9509	12.3958	12.1561	11.9003	11.5083	12.6731	10.4907	11.0583	11.7917	10.8625	12.407	11.7514	12.1637	12.5204	13.9212	12.471
hsa-let-7g-5p	12.9669	13.1676	13.1277	13.2615	13.6201	13.8976	12.4165	13.0717	12.6605	13.2052	13.1005	13.8302	13.3941	13.7612	13.9588	14.0209	14.3282	13.4401	13.9417	13.4011	13.4098	14.1287	13.0278	13.3612	13.5668	13.1346	13.4573	13.3265	13.6556	12.8338	12.5453	12.9289	13.6692	12.7274	13.5892	13.6683	13.5185	13.0939	12.9033	12.8083	13.3413	13.7181	13.6349	13.8646	13.3581	13.6734	13.4174	13.3282	13.2667
hsa-let-7i-5p	14.0835	14.4119	13.6323	14.5638	14.8169	14.4185	13.8719	14.28	13.8486	13.6534	14.2016	14.4325	14.4351	14.5423	14.3242	14.7567	14.3493	14.1294	14.5313	14.3638	14.4452	14.8597	14.097	13.9284	14.9899	14.5756	14.4592	14.3851	14.488	14.8271	13.7574	14.0269	14.5856	13.9517	14.6869	14.9412	14.4808	14.2621	14.1293	14.008	14.6301	14.5861	14.6503	14.5407	14.7126	14.8587	14.3908	14.4084	14.4677
hsa-miR-100-5p	9.0037	8.89531	7.68652	6.73419	8.10904	4.94649	7.19131	8.07411	8.73016	8.34906	8.8928	7.62485	8.50049	7.75181	6.2129	6.77698	5.79605	6.54133	8.69501	8.9783	7.68172	8.70473	9.09293	8.93678	8.26305	9.60082	6.01077	7.82478	8.26752	9.02989	11.7035	7.68205	7.57647	8.09972	6.88644	8.78188	7.8081	8.36626	6.92933	8.2331	9.54234	8.61567	7.85158	7.83059	8.863	7.54622	8.58989	6.36912	7.40081
hsa-miR-101-3p	13.0896	12.2693	11.7748	12.2803	11.9789	12.0246	12.0222	12.6246	11.9952	12.1791	12.3266	12.2204	12.5784	12.3643	12.1588	12.3008	11.9496	12.5269	12.5935	13	12.7864	13.5489	13.6455	12.003	12.2342	12.2963	11.4841	12.5888	12.1821	13.4075	12.7601	12.3871	12.3031	12.6445	12.6124	12.7181	12.5527	12.7821	12.4194	12.3058	13.3902	13.4317	12.6756	12.2301	13.2503	12.9296	12.8495	12.0463	12.6782
hsa-miR-106b-3p	8.91802	9.12977	7.44635	8.08566	8.68308	9.10492	7.85427	8.42272	7.96102	7.73608	8.48651	8.63484	8.26081	8.69801	8.48784	8.74381	8.50948	8.18967	8.73784	9.24839	8.94274	10.0464	9.75159	7.73815	9.01794	8.76355	8.29775	8.53338	8.54857	9.05845	9.07522	8.06401	9.04833	9.09097	8.47989	9.50229	9.42248	8.71774	8.62201	8.68501	9.8121	10.1969	8.40368	8.2966	9.85079	9.23842	8.51117	8.49146	9.01273
hsa-miR-107	4.79859	4.80784	3.85593	4.46117	5.60654	5.38014	3.94738	3.43025	4.60618	4.25434	4.70118	4.39353	4.47074	5.49289	5.45452	1.73259	4.03051	4.85577	4.54711	0	4.00526	0	3.28324	5.23091	5.04066	2.75712	5.34986	4.41964	2.90997	2.80107	3.37478	4.84448	5.18415	3.31399	3.23619	5.29968	5.37676	3.92332	4.24003	5.06317	1.21591	0	5.28598	4.9627	4.38726	3.96126	0.769708	5.0408	0.672885
hsa-miR-10a-5p	13.0844	12.5644	13.6994	12.7793	12.8576	11.8325	12.8747	13.7262	13.2185	12.9221	13.7675	13.0776	12.6589	12.8079	12.9308	12.8969	13.0125	13.0668	12.8211	14.0729	12.7711	13.2824	13.4848	13.2602	12.5587	13.299	12.4537	13.1813	12.562	13.9716	14.0963	12.939	12.3918	13.2203	12.633	12.5369	13.4477	13.5882	12.9302	13.2322	13.7606	13.7399	12.5747	12.9763	13.4687	13.0578	13.5298	12.5318	13.4158
hsa-miR-10b-5p	13.4768	13.7862	13.164	13.3331	13.709	12.3309	13.6226	15.5062	14.2967	13.9937	15.5518	12.7495	14.4428	12.5102	11.3076	12.8972	11.6794	12.3629	12.6463	15.5836	13.8765	15.1334	15.0744	14.0701	13.9944	15.353	13.511	13.6527	14.2811	16.9124	16.8068	13.6118	13.4457	13.9969	13.7784	13.3458	15.7889	15.3779	13.9917	14.5094	15.6937	15.505	14.5393	12.6103	15.4127	14.447	15.0601	13.2769	14.508
hsa-miR-122-5p	8.12965	1.80784	4.20385	3.87621	2.32113	0	1.69946	2.43025	5.4907	5.25434	5.04911	3.19189	6.40934	5.04879	0.298019	2.31755	3.58305	4.85577	0.672644	1.89084	5.89835	2.84675	5.8682	3.31897	0	1.94977	2.94776	5.09206	5.12296	4.80107	4.69671	6.5572	3.18415	4.31399	4.31419	6.03303	0	3.50828	3.72546	3.86853	3.80087	1.5933	2.64213	1.86316	0	3.79134	3.35467	0.548945	2.25785
hsa-miR-1229-3p	1.99123	2.80784	3.3965	3.46117	3.78057	3.48706	2.69946	4.16722	3.90574	3.44698	3.46414	4.45493	2.88578	4.77227	5.05291	5.09014	4.40902	4.37514	3.29713	0	2.19791	0	0	3.7149	3.45569	1.94977	3.78426	3.58956	3.90997	4.97099	2.37478	3.79004	2.76911	3.18846	3.97315	3.56271	2.91733	0	1.9181	3.99138	3.21591	3.5933	2.64213	4.26526	4.38726	3.3763	3.35467	2.3563	2.25785
hsa-miR-1246	9.34878	10.5793	9.05471	8.96367	8.67869	10.333	8.36124	9.86488	8.8345	9.2072	10.2219	8.64146	10.2389	9.18667	7.84234	7.79867	8.31838	7.55621	7.85089	10.2037	9.67161	10.8774	13.5001	10.4404	9.54581	11.0745	11.7159	10.247	12.5766	12.4788	11.551	10.038	10.7483	8.68903	8.82781	9.67558	13.3865	12.0907	10.0672	9.04023	10.4519	12.111	8.72959	12.2869	11.4041	10.3536	11.1663	10.1245	9.48024
hsa-miR-1255a	4.24757	5.97777	0.396497	1.87621	4.02157	5.30906	2.69946	4.30472	3.40824	4.25434	3.56368	3.45493	4.88578	5.41694	4.84234	3.98051	5.12362	4.70376	5.19621	2.89084	4.78287	4.16867	4.52425	4.44608	4.77762	4.4092	5.16277	5.17453	5.73594	3.80107	2.37478	5.02033	5.64358	0	3.38819	4.81064	5.6543	2.92332	0.918103	3.50596	4.53784	4.40066	3.96406	5.43084	5.38726	4.59869	5.29327	5.73877	5.31674
hsa-miR-125a-5p	10.5986	10.7591	11.6492	11.3397	10.1666	9.59034	10.2347	10.1918	10.0639	10.0632	11.171	10.4764	9.40148	10.2763	10.1187	10.0075	10.8223	11.2331	10.6651	10.5878	10.4049	10.0316	10.0259	11.0053	9.56944	10.2189	8.96854	9.88214	10.7921	11.7004	11.123	10.6485	10.6959	10.8857	10.9859	9.16386	8.987	10.2984	10.9567	9.50467	10.9923	9.60453	9.71627	9.74493	9.24525	8.96126	10.5428	11.1159	10.3167
hsa-miR-125b-2-3p	5.47952	0	3.30339	1.87621	4.49106	2.00163	2.69946	4.75218	3.96463	3.71002	4.04911	3.95743	5.2077	1.79245	2.03498	0	1.93098	3.59273	1.25761	5.4758	4.19791	1.84675	5.93233	3.90393	2.04066	4.1977	3.84085	4.62909	4.9741	5.50151	6.32898	4.58145	1.18415	2.89895	3.97315	5.00012	4.85593	2.92332	3.9625	4.58613	4.21591	4.91523	3.44948	3.64077	3.97223	6.07674	4.35467	1.54894	2.99481
hsa-miR-125b-5p	7.63829	7.1654	5.98146	5.04613	6.32113	4.43459	5.88928	6.20284	7.29805	6.64075	5.97872	5.91436	6.2077	6.81235	4.71306	5.22444	5.54989	5.28873	5.28735	7.44542	6.51984	6.16867	7.56527	5.6635	6.18361	7.26265	3.78426	6.23982	7.05787	6.60842	9.64624	6.02033	6.70771	6.65977	6.04354	6.30867	6.54182	5.09325	6.03704	6.13822	7.48269	7.05273	5.96406	6.70686	6.55719	5.79134	7.48395	4.30383	6.60362
hsa-miR-126-3p	12.7365	12.6152	12.6561	12.4882	12.523	11.922	12.6153	12.2182	12.7891	12.5343	12.3758	12.5608	13.0343	12.6294	12.4274	13.0207	12.7454	12.1531	12.7301	12.2832	12.6242	12.1619	11.9748	12.6229	12.5475	12.1122	12.373	12.4874	12.3297	11.1912	12.5321	12.7888	13.0123	12.3001	12.0827	12.1797	11.9708	11.9948	12.4711	12.3927	12.1258	12.1334	12.6057	12.6956	11.8701	12.4079	12.1415	12.5164	12.4076
hsa-miR-126-5p	15.8451	15.3036	16.0463	15.6374	14.952	15.1201	16.2589	15.4528	16.0155	16.1863	15.8084	15.5997	15.9553	15.4995	15.5047	15.6621	15.6613	15.5367	15.7177	15.6028	16.0298	15.2544	15.6946	16.309	15.1191	14.6266	15.4177	15.328	15.0316	14.2336	15.4032	16.0248	15.4523	15.5204	15.2849	14.9735	15.1842	15.2619	15.9007	15.913	15.4468	15.3049	16.0439	15.5573	14.9023	14.9967	15.2666	15.5912	15.6332
hsa-miR-1260b	3.7282	2.80784	5.52578	1.87621	5.36553	5.17156	4.02138	4.30472	3.78021	4.58449	3.35723	3.86997	5.79267	3.66692	5.38548	4.1249	5.14599	5.56359	5.20662	5.69819	3.36783	0	3.63116	5.96586	3.91513	5.4092	3.59984	3.87907	2.90997	0	3.95974	4.92249	4.64358	3.72903	2.65122	4.90849	3.33237	1.92332	4.56196	4.20956	2.80087	3.5933	4.34257	4.14327	2.38726	3.3763	0	4.54894	4.67288
hsa-miR-127-3p	4.75204	5.71473	6.53605	6.96367	7.45042	6.61044	7.48082	6.01522	5.84434	5.42884	6.72288	8.81541	3.47074	6.58253	6.26765	8.09453	9.92614	7.25266	9.51604	7.59128	4.89835	7.97603	4.14574	4.62563	4.26305	5.11969	7.26969	7.09206	9.46734	0	5.46224	4.21888	5.82801	6.37289	6.94891	7.4082	6.56119	6.62376	7.47652	5.5665	6.50131	7.29374	3.81205	6.91378	4.97223	7.3763	7.82499	9.41622	7.51837
hsa-miR-1271-5p	4.8874	6.26728	5.78881	3.46117	5.17912	4.20327	5.69946	0	5.38686	5.63285	3.11622	5.48468	4.47074	5.62253	4.61995	4.53994	5.16801	4.47244	5.25761	4.21276	0.197908	5.01667	4.28324	5.7004	4.26305	4.47333	2.84085	4.46403	5.09439	0	6.62271	4.94758	5.57647	5.53639	5.15372	4.6216	1.33237	2.92332	2.24003	5.00603	4.21591	0	4.81205	4.41336	0	3.11326	3.35467	4.45584	4.92081
hsa-miR-1273h-3p	6.17003	5.97777	6.15139	6.87621	6.10249	6.72955	5.78692	5.75218	6.40824	5.71002	6.98771	6.71546	6.27809	6.41043	7.12668	6.30244	6.73095	6.81306	6.64992	5.06076	6.79782	5.54719	4.07173	6.54678	6.50009	6.66401	6.6482	6.67703	6.78145	7.04899	4.54471	6.4733	6.27161	5.70631	7.51747	6.28153	6.35474	6.31564	6.31898	6.09092	6.07389	4.91523	6.87095	6.24563	5.70919	7.14889	6.97916	6.45584	6.57978
hsa-miR-1273h-5p	2.40627	2.80784	2.85593	4.19813	2.9061	3.92763	2.69946	5.16722	2.90574	3.58449	3.74425	4.19189	0	4.11438	4.82158	4.1249	4.29355	3.85577	3.99457	3.89084	3.36783	4.84675	0	3.42859	4.45569	5.15922	4.26969	4.06349	3.69846	4.80107	4.18214	3.33752	3.18415	1.72903	3.7667	5.06521	3.50229	3.92332	2.82499	3.76899	0	4.17826	4.22709	3.64077	0	4.79134	3.35467	3.71887	2.99481
hsa-miR-1275	3.06923	5.71473	2.3965	3.46117	1.32113	7.13503	1.69946	0.845292	2.32077	3.21252	1.97872	4.72795	2.88578	4.04879	2.03498	5.66332	4.37155	2.94888	3.8156	1.89084	3.51984	4.6541	0.823807	1.8784	4.36259	4.34208	4.1848	3.58956	2.45054	5.2605	1.37478	3.41153	5.09104	0.72903	3.23619	3.43718	4.13972	2.92332	1.9181	2.76899	0	0	0.642128	4.37773	3.70919	4.25077	5.57706	4.79687	4.37332
hsa-miR-1277-5p	7.28074	6.4517	7.13121	6.96367	6.81299	6.46106	6.8492	5.79949	7.12167	6.64075	6.16458	6.85865	6.97324	7.36062	6.97044	6.68678	6.63141	6.75623	6.80878	5.9783	6.44584	3.84675	6.2332	6.93832	6.66515	5.78266	7.11195	6.63881	6.94239	7.2605	6.41918	7.49048	6.82801	6.79512	6.49253	6.82324	6.5803	6.62376	6.27565	7.07364	4.91635	3.91523	6.94591	6.83059	6.34146	7.09512	4.76971	6.58237	6.62708
hsa-miR-128-1-5p	3.34487	4.6152	3.09694	2.87621	2.32113	3.58659	2.28442	3.43025	2.32077	2.12505	3.46414	4.26228	2.88578	3.26638	4.03498	4.19202	3.44555	2.2708	2.78812	3.4758	4.19791	2.84675	3.28324	2.15851	3.26305	2.53473	3.22787	3.41964	3.25789	5.50151	1.37478	3.79004	1.18415	0	3.7667	3.37007	1.33237	0	3.50306	2.28356	2.80087	2.5933	2.96406	4.1002	2.38726	0	3.76971	3.87087	3.25785
hsa-miR-128-3p	10.7506	10.1959	10.7336	10.1936	9.94135	9.96742	10.4042	10.3271	10.6723	10.3593	9.97307	10.0031	10.5793	9.58903	9.79986	10.5172	10.0536	10.035	10.3591	10.5808	10.5719	10.4978	10.8662	10.3913	10.0045	9.90687	10.3147	10.5269	10.2611	9.86176	11.0312	10.7826	10.369	10.6832	10.0335	9.36899	10.003	10.3285	10.3147	10.7714	10.3606	10.7954	10.397	9.96044	9.97972	9.87614	10.2373	10.3531	10.212
hsa-miR-1285-3p	5.75204	2.80784	4.15139	3.46117	3.12849	4.74579	5.92828	0.845292	4.36517	5.23358	4.11622	3.03989	4.2077	4.85134	5.34241	4.86187	5.33307	5.39182	5.43641	5.79773	4.65734	4.16867	6.70645	5.79896	3.62562	3.2717	4.42581	4.32653	3.25789	1.80107	5.07522	5.13399	1.18415	5.72903	3.23619	5.57766	3.50229	1.92332	3.8723	5.60549	5.53784	4.76322	2.22709	4.37773	4.97223	3.79134	4.57706	4.00838	5.19645
hsa-miR-1292-5p	3.62866	3.80784	3.30339	4.87621	4.49106	3.20327	3.3999	5.23761	3.6427	4.33451	4.65679	3.19189	5.34521	3.37741	1.71306	4.43303	2.29355	2.75623	3.8156	4.89084	4.1048	4.43171	5.57869	2.46336	4.45569	4.90396	3.89529	3.74157	4.80809	0	4.69671	3.25952	4.18415	5.01443	3.23619	3.14767	4.85593	4.73068	3.44166	4.44276	4.53784	5.76322	5.03445	2.64077	7.03112	5.8788	6.35467	1.54894	4.25785
hsa-miR-1301-3p	6.3291	8.48027	6.83944	5.04613	8.38722	6.70761	6.53235	4.54573	6.39759	6.53444	3.11622	5.57041	6.1337	8.21871	7.30177	5.25615	6.29355	5.89139	6.68759	3.4758	5.59023	3.84675	6.61822	6.55888	7.19716	6.78266	6.74032	5.82903	5.79039	0	6.46224	6.70431	8.43208	5.56192	5.58982	7.3309	5.6543	5.73068	3.9181	5.68045	2.21591	4.76322	5.99968	7.19536	6.47473	4.79134	5.62769	5.52622	5.62708
hsa-miR-1304-3p	7.09277	7.5892	7.1176	8.10502	8.14131	7.34504	7.45434	7.78781	6.89063	7.24399	7.65114	6.98891	8.42493	7.25188	7.43073	7.46729	7.13485	7.73024	8.65088	6.4144	7.84896	7.37031	6.8682	7.25344	8.10675	7.87458	8.05629	7.73705	7.59009	7.32463	6.80105	7.27942	7.72331	6.91885	8.20581	8.51885	7.38765	7.59575	7.70601	7.00603	7.282	7.01956	8.37005	7.45668	6.03112	7.69823	6.47015	8.32373	7.38713
hsa-miR-1306-5p	3.8657	0	4.56642	3.87621	3.32113	3.00163	3.28442	0.845292	4.53023	5.05579	1.97872	4.19189	0	3.32297	3.92251	4.1249	3.82406	4.34119	1.67264	1.89084	3.36783	0	3.99373	2.97793	3.26305	2.75712	3.22787	4.27762	2.45054	0	2.95974	3.0896	3.18415	2.72903	2.65122	2.29968	4.23926	0	0.503065	3.37667	0	0	4.10156	4.51524	0	3.79134	2.76971	3.94126	1.67288
hsa-miR-1307-3p	7.15222	7.73858	7.45719	7.57665	7.47088	8.08697	7.82358	7.66547	7.67392	7.51307	6.74425	7.59107	7.52963	7.86332	8.12245	7.80405	8.06907	7.92616	7.85917	6.4144	7.1521	5.01667	7.42372	8.2029	7.53251	7.67087	8.54767	7.75949	7.94639	7.47349	7.56461	8.18763	7.82801	7.16366	7.4413	7.78188	7.07383	6.62376	7.32324	7.5665	6.53784	7.29374	7.72959	7.7939	7.67267	8.5328	7.66453	7.62041	7.42777
hsa-miR-1307-5p	6.24757	6.56273	5.83944	6.04613	5.4086	6.83452	6.94738	6.01522	5.95013	6.14742	6.21138	6.13675	5.97324	6.32297	6.40654	6.10762	6.40902	6.69707	5.65754	5.59128	6.28537	6.16867	6.69417	6.51399	5.54316	5.11969	6.48026	6.29	5.8768	0	6.54471	6.0896	5.64358	6.01443	6.11066	5.16757	6.48212	6.09325	6.61159	6.04201	7.1228	7.20801	6.10156	6.49043	6.67267	6.3763	6.41356	5.83435	5.88234
hsa-miR-130a-3p	11.2131	10.5627	10.9587	10.5092	10.7505	10.0747	10.1893	10.8607	10.8429	10.8333	10.6175	10.4727	10.3246	10.5063	10.3578	10.4121	10.3816	10.4656	10.5417	10.695	11.0683	11.1252	11.851	11.1965	10.8176	12.6798	10.588	10.2992	10.7865	11.0702	12.6036	10.8432	10.4993	11.0717	10.5226	11.1731	11.0947	10.8481	10.4846	10.867	10.8489	11.0771	10.9019	11.1259	10.5345	10.848	10.5263	10.4937	10.4444
hsa-miR-130b-3p	9.53555	8.95759	8.71165	8.9206	8.77235	7.6339	8.88928	8.90599	8.71309	9.16534	8.51166	8.95743	8.69313	8.54585	8.33877	9.01336	8.89676	8.24579	9.09541	9.35027	9.33233	9.89659	9.83083	9.59607	9.02934	9.81085	9.6482	9.35037	9.16134	9.10485	10.5015	9.22531	8.99151	8.86602	8.85417	8.94785	9.43566	9.18071	9.11655	9.02323	9.45431	9.93315	9.14595	8.65757	9.16205	9.34976	8.90926	8.6417	8.7497
hsa-miR-130b-5p	7.61897	8.52209	8.08999	7.49092	8.75993	6.87446	7.91862	7.61348	8.09885	7.92272	7.11622	7.90888	7.2077	7.35045	7.08374	7.92734	7.58305	7.6802	7.34035	6.69819	7.38773	6.4906	6.78959	7.97944	8.28858	8.18339	8.00769	8.14756	7.45054	7.65905	7.78417	8.15838	8.76158	7.25259	7.79418	7.89363	7.35474	7.01078	7.46113	7.79874	7.23827	7.29374	7.81205	7.34121	6.91083	7.13119	7.65235	7.26319	7.80217
hsa-miR-132-3p	5.8657	5.71473	5.20385	4.68356	5.96499	5.3662	5.37188	5.79949	5.87536	6.0077	5.96057	5.57041	5.47074	5.23724	6.10537	5.53994	5.12362	5.09862	5.44523	6.4144	4.78287	2.84675	5.3784	6.08227	5.26305	6.03723	5.72537	4.54892	5.35743	5.50151	5.89834	5.44715	4.9915	5.70631	3.87362	5.26315	4.97622	6.24525	5.51802	5.00603	5.30337	4.40066	4.34257	5.69966	6.47473	5.59869	5.93963	5.61503	4.92081
hsa-miR-134-5p	4.90877	6.39281	7.58137	6.96367	7.67869	7.89887	6.32881	5.79949	6.60618	6.75441	6.58753	6.07942	4.88578	6.95792	5.90288	5.3473	7.38572	6.26176	6.3777	5.79773	5.68976	6.09467	4.82381	5.89122	5.70362	4.53473	6.1848	5.39692	7.32705	4.60842	5.28167	4.79004	6.18415	6.34374	6.75276	6.87257	5.33237	5.92332	6.31042	5.46414	5.21591	5.50019	4.34257	7.14856	1.38726	5.3763	5.29327	6.53763	5.99481
hsa-miR-136-3p	6.28891	5.6152	8.46528	7.19813	7.3435	6.21886	6.99408	5.16722	7.74284	7.07342	6.66802	6.75261	5.2077	6.61121	5.61995	6.60295	6.91804	6.69707	6.83923	4.69819	5.78287	7.0562	5.10921	5.79896	3.91513	5.53473	4.99839	6.10614	7.07989	0	6.23276	5.51586	5.18415	8.03281	6.11066	7.11217	6.54182	6.24525	7.5511	7.12487	5.97079	3.17826	4.89006	6.73528	6.03112	5.64932	6.29327	7.05674	5.71728
hsa-miR-139-5p	5.89812	7.12977	5.50502	5.04613	7.45042	7.81413	5.37188	4.43025	6.54959	6.97054	4.04911	5.45493	6.47074	5.4427	6.93222	5.46051	5.67821	5.90307	5.90146	4.89084	5.78287	6.6541	3.28324	6.00178	6.21058	7.09951	5.33023	5.5071	5.60028	0	5.69671	6.0896	8.26097	5.61167	5.73869	6.53234	4.91733	6.09325	5.29314	6.12487	3.53784	4.5933	5.77141	5.34121	4.70919	5.11326	3.57706	5.3563	4.84281
hsa-miR-140-3p	10.3783	11.0026	10.3272	10.7435	11.1658	10.927	11.0321	11.1027	10.4648	10.781	10.2752	10.061	10.6407	10.7862	10.6519	10.2891	9.77736	10.4871	10.4546	10.4493	10.6388	10.7233	10.6926	10.5579	11.2799	10.9484	10.7426	10.4217	10.0128	11.5824	10.4328	10.3957	11.16	10.0408	10.2084	11.7131	10.506	10.7242	10.8591	10.4091	10.4351	10.6701	10.8769	10.9495	11.1186	10.6571	10.2106	10.41	10.3541
hsa-miR-141-3p	5.45066	5.50828	4.92006	4.87621	4.22802	4.07202	5.02138	6.36885	5.74704	5.44698	6.35723	3.95743	6.2077	5.35045	2.61995	5.3473	5.18971	4.92616	3.04188	7.72373	5.00526	7.43171	7.63759	2.77148	4.45569	4.03723	4.31033	7.66756	4.65999	5.60842	5.28167	5.31842	4.88459	5.53639	5.79418	3.06521	6.26311	7.62376	7.31042	6.17109	5.73947	7.42619	4.54902	5.34121	6.55719	5.64932	7.8358	5.0408	6.60362
hsa-miR-142-3p	8.36627	7.78512	8.39931	7.89857	7.60654	8.13091	8.76824	7.85652	8.70448	8.44923	7.55161	7.88119	8.17118	8.23355	8.65557	7.90251	8.23736	8.28427	7.8674	7.28315	8.31685	7.09467	8.35908	8.96131	7.77762	7.48115	7.96695	8.47221	7.37535	5.80107	8.19496	8.94913	7.5417	8.05096	7.66617	7.91439	7.99058	8.03185	8.24003	8.36536	7.32443	7.70182	8.10973	8.0187	8.11519	7.85743	7.47015	7.9065	8.03044
hsa-miR-142-5p	15.1862	14.0309	14.5327	14.5671	13.9385	14.8469	14.5513	14.8635	14.8804	14.6578	14.6817	14.3568	14.4857	14.1425	13.968	14.4969	14.2095	14.0621	14.7178	15.4991	15.0048	15.898	15.8697	14.5983	13.9756	13.9029	13.9721	14.5382	14.4396	13.7436	14.8787	14.9474	14.1975	15.0576	14.6604	13.6002	14.7304	15.0745	14.5385	15.1363	15.3255	16.0189	14.3437	14.0547	15.066	14.5024	15.0677	14.3065	14.7075
hsa-miR-143-3p	12.2446	12.1444	12.4356	13.447	13.1357	12.9671	12.4647	13.0453	11.5204	12.3805	13.5954	11.9821	13.4537	11.8032	11.2004	11.9442	12.3107	12.2415	12.3133	14.1719	12.7864	12.6922	13.3433	12.3952	13.3971	13.172	13.3564	12.0887	12.4239	14.3666	12.4314	12.1679	12.2347	12.4512	12.8439	13.0211	12.7542	13.4941	13.0624	11.594	13.5521	13.0445	13.49	11.9151	13.2394	12.1217	12.8782	11.9536	13.7735
hsa-miR-144-3p	12.2983	10.628	9.21827	10.071	10.1698	9.60674	10.1152	11.2116	10.659	10.0282	11.4637	10.8161	11.1146	10.6953	8.63192	11.2915	9.73925	10.1313	11.0256	13.1923	11.8377	13.9885	13.87	9.57238	10.0704	10.8132	8.55192	10.6717	11.6129	11.7982	12.6899	10.4543	10.8352	11.9902	10.872	10.4826	11.9883	11.7047	10.8566	12.1795	13.2149	13.7264	9.78933	9.59884	12.5471	12.0475	12.507	10.0686	11.7302
hsa-miR-144-5p	9.71688	8.72671	7.30339	8.7091	8.37642	8.03726	8.0745	9.62008	8.55439	7.6987	9.64121	8.40524	8.95186	8.49443	7.00768	9.39258	7.95017	8.1263	8.91582	11.0905	9.42673	11.6166	10.9086	7.31897	7.87355	8.66401	7.69499	8.98188	9.58881	10.7869	9.83421	8.48406	8.65988	10.3391	9.17217	8.35279	10.1219	9.53803	9.11409	9.58552	10.9708	11.2426	8.10156	7.47366	10.6185	10.3031	10.4226	8.73382	10.1667
hsa-miR-145-3p	5.7282	5.6152	6.52578	5.19813	4.8447	3.84963	5.31417	7.14907	5.6427	5.8393	6.66802	4.95743	6.27809	3.20749	3.29802	4.59057	4.85154	6.03634	5.20662	6.93523	5.9528	2.84675	6.28324	5.2805	3.91513	3.65021	4.31033	4.77719	5.33318	0	6.83421	4.81752	3.76911	6.69481	6.45858	2.14767	4.33237	6.7813	6.24902	5.6246	6.88833	5.40066	6.87095	4.0558	4.55719	4.69823	6.41356	3.87087	5.0652
hsa-miR-1468-5p	5.52175	5.80784	4.75405	5.87621	6.22802	5.61044	5.3999	5.16722	5.4907	5.86652	5.97872	6.03989	3.88578	6.02341	5.5957	5.84111	5.95651	5.80686	5.24755	5.79773	5.59023	6.23906	5.95309	5.51399	6.18361	6.13959	5.58335	5.87907	5.57982	6.04899	5.18214	5.27942	4.88459	4.68323	5.7667	6.36145	5.68992	4.73068	5.10793	5.18403	5.30337	5.98562	6.22709	6.04449	4.55719	5.79134	5.47015	4.59334	5.57978
hsa-miR-146a-5p	11.9527	12.2044	12.7595	13.856	11.7124	11.7753	12.7635	14.095	12.956	12.4858	13.7883	13.2257	13.5793	12.5035	10.5957	13.782	12.1958	11.0479	13.2733	13.3645	13.7382	13.3351	12.7262	12.2613	12.3303	12.3565	13.1119	13.0114	13.4426	14.169	13.0191	12.3365	12.1478	12.7269	13.0754	10.515	12.8235	13.77	13.5932	12.354	13.9833	13.2626	13.6614	12.7293	12.4971	13.2485	13.1338	13.8463	13.6985
hsa-miR-146b-3p	4.7282	4.39281	3.85593	4.19813	3.9061	6.70207	4.74385	5.16722	4.4907	5.23358	4.90472	5.59789	5.58622	5.41694	5.87293	4.90251	5.16801	4.40831	4.64227	5.21276	4.59023	6.23906	5.14574	4.5946	4.36259	5.2717	5.61614	5.98949	5.00512	5.70796	5.07522	4.61316	5.50608	4.25259	5.49253	5.56271	5.85593	5.83021	5.00556	4.80294	4.91635	5.76322	5.39702	5.32259	5.77958	6.03926	5.22914	5.10353	5.71728
hsa-miR-146b-5p	10.2884	10.612	10.7048	12.1823	10.3041	10.8421	10.7783	12.5647	11.0238	10.5302	12.6986	11.6591	12.5133	10.4797	8.81766	12.1541	10.6545	9.1387	11.5665	12.0856	11.9469	11.8096	10.1356	10.4084	10.6067	10.824	11.7079	11.5729	11.54	12.5987	10.2907	10.7139	10.585	10.6941	11.855	9.42483	11.2661	12.252	12.5471	10.5619	12.5151	11.6594	12.4349	10.4073	11.2942	11.9103	11.7605	12.0557	12.1617
hsa-miR-148a-3p	13.9824	13.8729	13.761	13.9206	13.7729	13.6476	13.2865	13.3109	13.4673	13.4439	13.669	12.9344	14.2231	14.0458	13.7648	12.7009	12.6901	13.9645	13.2099	13.5579	13.6915	13.031	14.6414	14.4213	13.8007	13.6305	13.8042	13.81	13.9366	13.2131	13.8182	13.8291	13.8926	13.6012	14.2866	15.0464	14.071	13.5283	14.4091	13.5812	13.1632	12.927	14.0608	14.0509	13.5731	12.9401	13.1815	13.9202	13.5402
hsa-miR-148a-5p	6.42122	7.20016	6.11074	7.04613	5.9061	7.23429	6.05701	6.79949	6.06224	6.81854	6.81666	6.37776	7.69313	7.13032	6.99846	6.01799	6.62347	7.2708	6.2118	5.9783	6.9528	3.84675	7.51729	7.24846	6.56422	5.99416	6.29015	6.73252	7.21872	7.68371	6.66018	6.35638	5.88459	6.22088	7.07749	7.77216	6.91733	6.56718	7.79769	5.99138	6.2603	6.84123	7.48762	7.08371	7.11519	6.18365	5.01764	7.22842	6.93967
hsa-miR-148b-3p	11.6988	11.9124	11.8806	11.8463	12.1896	11.7645	11.9388	12.0633	11.9549	12.1807	11.6585	11.9027	11.5914	12.2	12.0941	11.5789	12.0316	12.5832	11.6154	10.472	11.7254	10.3545	10.5577	11.9701	12.0635	11.5063	12.028	12.1414	11.6649	11.5256	10.9408	12.1721	12.0933	11.4885	11.8631	11.7612	11.6281	11.8317	12.1629	12.0322	11.052	10.2798	12.5655	11.967	11.0184	11.4207	10.9182	11.7865	11.9982
hsa-miR-148b-5p	5.61572	4.80784	5.75405	4.68356	4.49106	5.23429	5.5821	5.93275	6.26329	4.93241	4.51477	5.57041	5.34521	5.25188	5.82158	6.27174	5.9816	5.75623	4.97032	2.89084	5.84176	4.6541	5.18136	5.43736	4.36259	5.2717	5.22787	5.30228	5.95833	5.50151	4.54471	5.54903	5.93904	5.34374	5.15372	4.40401	4.97622	5.50828	5.86062	5.7254	4.67534	5.17826	6.03445	5.85022	4.8467	5.79134	0	5.45584	5.84281
hsa-miR-150-3p	2.52175	4.12977	0	4.68356	4.22802	6.13091	4.02138	5.84529	4.87536	3.87994	5.24175	4.3294	4.47074	3.62253	0	4.05451	1.70858	2.75623	4.49707	5.06076	4.84176	6.84675	5.10921	1.65601	4.45569	4.34208	2.94776	1.41964	4.30852	0	5.37478	3.61316	4.35407	4.53639	4.7667	2.14767	5.85593	5.62376	3.00557	4.13156	6.21591	6.29374	1.64213	3.91379	4.97223	7.55952	6.05511	4.07251	4.48024
hsa-miR-150-5p	9.93375	8.52209	9.35505	9.24253	8.41389	13.2144	9.70227	10.5124	11.4941	9.88244	10.473	9.36981	9.15256	9.39154	9.05513	7.99937	9.02449	9.37514	9.29714	10.1855	9.33233	11.1505	11.6344	9.07386	8.17679	8.48504	6.81989	9.04169	8.47013	9.65905	10.0472	9.97758	8.8062	10.8467	9.06908	8.47959	9.41185	10.1569	8.38367	11.2274	10.5535	10.8317	8.43003	9.2182	9.83848	10.7221	10.0081	8.10737	9.65873
hsa-miR-151a-3p	14.1337	14.5334	14.3305	14.3995	14.5423	14.3662	14.3525	14.1847	14.2063	14.1811	13.9833	14.1008	13.8198	14.3234	14.7356	14.3379	14.1905	14.2265	14.1303	13.5721	14.3628	13.4401	13.9664	14.1847	14.9117	14.543	14.5306	14.4142	13.792	13.2289	13.6608	14.2573	14.4496	13.6234	14.3799	14.6673	14.2389	14.0813	14.3348	14.2198	13.7812	13.5336	14.3268	14.4943	13.9649	13.8633	13.5953	14.2347	13.9885
hsa-miR-151a-5p	13.4488	13.7693	13.6344	12.9007	13.6084	12.735	13.2897	12.9334	13.5237	13.0879	13.0739	13.3956	12.4689	13.7435	13.7639	13.3874	13.7477	13.3988	13.3256	12.314	12.9499	12.1379	12.6726	13.1833	13.5026	13.2676	13.2002	13.2708	13.1516	11.9329	12.9193	13.6539	13.7766	12.9438	13.1967	13.2269	12.656	12.7006	13.2203	13.3602	12.6216	12.0269	12.9936	13.4118	12.4567	12.8275	12.4766	13.1736	13.1182
hsa-miR-152-3p	7.38736	7.42255	7.04035	6.63109	7.82098	6.56845	6.79749	6.95382	7.22766	6.63285	6.64547	7.39353	6.58622	7.06961	7.4135	6.70986	6.12362	6.54133	6.87885	7.28315	6.73707	6.43171	6.80109	7.24846	7.6941	6.66401	6.93482	6.61931	6.3694	5.80107	6.95974	7.20334	7.57647	6.84797	6.25609	7.03303	5.75863	6.56718	6.85474	6.86049	5.53784	6.05273	6.94591	7.05016	7.8467	6.14889	6.74699	6.76811	6.84281
hsa-miR-155-5p	8.15222	8.85224	8.21348	8.30247	8.75993	9.54698	8.5882	8.54573	8.41089	8.15296	8.9742	8.86149	7.69313	8.30025	9.00882	8.66628	8.57277	8.29761	8.19097	8.3171	8.35778	8.86911	8.51729	8.62946	8.70836	8.23054	8.78065	8.43645	7.54857	9.13198	7.41918	8.07544	8.78406	8.34005	7.94891	8.55329	8.54182	8.09325	8.23099	8.20004	8.2603	8.62672	8.06839	8.40453	8.66339	8.53953	8.0271	8.12637	8.40759
hsa-miR-15a-5p	11.8869	10.5459	9.48529	9.94767	10.0129	10.2266	10.6602	10.9486	10.3459	10.3581	11.0215	10.468	10.7218	10.2731	9.23466	10.7536	9.8634	9.8053	11.2304	12.5365	11.6465	13.4761	12.8127	9.53355	10.1579	10.638	9.01692	10.3243	11.2755	10.4876	11.6333	10.3991	10.686	11.3738	10.6493	10.1439	11.9594	11.4605	10.5162	11.4274	12.9176	13.0887	9.87095	9.64077	12.2066	11.4752	12.0916	10.3385	11.1405
hsa-miR-15b-3p	5.67929	4.39281	3.98146	2.87621	4.4086	3.07202	3.02138	4.75218	3.5687	4.48261	3.90472	2.67732	2.88578	3.42988	1.03498	2.53994	3.29355	3.03634	3.44523	6.21276	4.19791	5.6541	6.05263	3.5629	1.45569	4.03723	0.140406	3.74157	3.77246	0	3.69671	3.94758	5.09104	5.51039	5.06626	3.73264	2.91733	4.50828	4.82499	5.23465	6.07389	4.5933	4.34257	3.37773	3.70919	5.18365	1.76971	4.50314	4.84281
hsa-miR-15b-5p	8.85611	8.11163	9.20546	8.41536	9.41653	8.42117	8.50359	8.48192	8.98255	9.0865	8.75219	8.71546	8.18956	8.20561	8.75472	8.43994	8.68013	8.90016	8.37077	8.49075	8.64912	9.4761	8.72165	8.53967	7.86509	8.8864	8.46008	8.24936	7.78145	6.60842	8.3173	8.90658	9.06067	8.73184	8.43258	8.42276	8.29815	8.38275	8.80227	8.74736	8.69164	8.70182	8.32863	8.19535	7.863	7.93089	8.19597	8.42546	8.56163
hsa-miR-16-2-3p	9.66993	7.73858	7.46796	8.17999	7.73899	7.21498	7.85933	8.74616	8.17252	7.50009	8.68469	7.81248	8.0557	7.21124	6.19687	8.56547	7.38101	7.58187	9.12523	10.2702	9.37533	10.9631	10.7034	6.90709	7.94755	8.30732	6.33023	8.29922	8.8705	8.55595	9.7057	7.95996	8.01704	9.88258	8.82781	7.79473	9.32672	9.08319	8.39788	9.18	10.6061	10.3348	7.85158	6.89501	9.67267	9.3305	9.87037	8.34011	9.21204
hsa-miR-16-5p	16.1853	14.688	14.793	14.8086	14.5891	14.6808	15.1467	15.2122	15.3201	14.913	15.1164	14.9777	15.3038	14.9302	14.4692	15.223	14.7175	14.5352	15.478	16.7079	15.9418	17.2448	16.9084	14.6514	14.4991	14.6411	14.3835	14.6374	15.2978	13.9352	15.8277	15.016	15.0356	15.9438	14.8309	14.3135	15.713	15.4813	15.0855	15.6882	16.6053	16.8455	14.7005	14.6121	16.2488	15.155	16.0855	14.8055	15.5158
hsa-miR-17-3p	4.43602	3.80784	3.71843	0	3.12849	3.13914	4.34331	4.30472	4.45006	3.71002	4.11622	2.86997	4.88578	4.90793	3.23662	4.98051	4.54989	4.03634	3.64227	4.4758	4.28537	3.84675	6.19885	4.31897	4.15613	4.53473	1.94776	4.70504	3.84285	0	5.07522	4.84448	3.50608	4.77342	4.58982	3.73264	5.91733	3.50828	4.8723	4.23465	6.30337	5.76322	4.44948	3.81069	5.38726	3.59869	3.35467	3.79687	3.99481
hsa-miR-181a-2-3p	8.00866	8.69049	8.07245	8.7217	9.36826	9.10177	8.56364	9.41515	8.18186	7.78683	8.50228	8.42071	7.88578	8.42181	8.80714	8.22844	8.45901	8.85276	8.17647	7.4758	8.63254	8.07556	7.85171	7.83093	9.00259	8.71132	8.61208	8.60946	8.02797	9.54253	7.52453	8.02623	8.63536	8.36928	8.4714	9.20175	8.83221	8.79369	8.38571	8.13156	8.82324	8.46367	8.67555	8.43735	8.32978	8.45667	8.07349	8.05277	8.31674
hsa-miR-181a-3p	6.48664	5.71473	6.13796	7.52006	7.25187	7.69093	6.78692	6.84529	6.16626	6.85976	6.8367	6.05979	6.83997	6.65043	6.95623	6.95175	7.06026	8.10875	6.95187	6.84503	6.44584	5.84675	6.6567	6.6635	7.58498	8.08932	5.81283	7.65804	6.52735	7.58243	5.37478	6.51586	6.57647	5.85831	7.09969	7.30867	7.93228	7.0526	7.4259	5.92357	6.85976	5.91523	7.54902	6.61039	7.11519	7.2176	6.5246	7.34984	6.84281
hsa-miR-181a-5p	14.9053	14.1568	14.294	15.0372	14.8953	15.6854	14.6743	15.0357	14.397	14.9696	15.0382	15.1726	14.2472	15.1913	15.0917	15.5078	15.7957	15.9839	15.2635	14.966	14.5685	14.9329	14.9181	14.6353	14.7073	15.314	14.2215	15.1718	14.5667	15.8025	14.037	14.6852	14.1223	14.3953	14.8814	14.7705	15.0828	14.9221	15.1837	14.3096	15.337	14.9084	15.0423	15.0445	14.8117	15.6285	15.164	15.1654	15.2658
hsa-miR-181b-5p	9.44336	9.10247	9.17786	9.9206	9.86029	10.9735	9.46267	10.0052	9.46671	9.83672	10.3132	9.98891	10.0756	10.3238	10.0372	10.9	10.7894	10.7603	10.3315	10.2396	9.72929	9.9289	9.63919	9.90551	10.121	11.4441	9.59573	10.4681	9.86522	11.1826	9.52453	9.51481	9.41777	9.47554	9.95043	10.3347	10.5172	9.97317	10.1361	9.51878	10.4757	10.3212	10.1948	10.838	10.3091	11.0756	10.3243	10.1973	10.0991
hsa-miR-181c-3p	6.12509	6.93713	6.24199	5.87621	7.21595	6.52519	6.72182	5.97457	5.95013	5.98304	5.88561	7.11789	5.58622	6.87045	7.05735	6.05451	6.83787	6.2708	5.37308	5.35027	6.38773	6.01667	5.55173	5.31897	6.70362	5.37603	5.94776	6.41964	5.71732	0	4.54471	6.11196	5.93904	5.87878	5.65122	6.71246	5.46165	6.96772	5.8723	5.17109	5.60823	6.40065	6.22709	6.94455	6.43166	5.49178	6.22914	5.67823	6.13232
hsa-miR-181c-5p	8.34878	7.83021	8.18113	8.00549	7.87572	8.09755	8.04818	7.87871	7.85605	7.41507	8.09142	8.71546	6.34521	8.47271	8.37305	8.2164	8.86846	8.03103	7.53683	7.72373	8.13454	7.62811	7.91656	7.7004	7.82202	6.75712	7.21722	8.00084	8.05787	8.60842	7.50406	8.04379	7.64358	8.25259	7.69562	7.39981	7.71607	8.28087	7.9815	8.04201	8.03609	8.33477	7.802	7.87598	7.91083	8.26707	8.55761	7.6885	8.07376
hsa-miR-181d-5p	6.93505	8.33141	7.26686	7.12413	7.5403	7.4806	7.19131	7.18514	6.9932	7.49138	6.76531	8.21426	5.88578	7.97347	8.06179	7.65145	7.79605	6.87961	6.83252	7.10029	7.1048	6.37031	5.95309	6.64847	8.17679	7.50436	7.27996	6.92743	6.98192	7.7318	6.54471	7.15569	7.89839	6.71772	6.997	7.64663	6.93228	5.92332	6.40192	6.67129	6.57346	6.8787	7.10156	8.04733	7.45335	7.36119	7.5246	7.1414	6.84281
hsa-miR-183-5p	8.52521	6.33141	4.92006	7.12413	6.3435	7.29809	5.65365	6.82257	6.9932	7.45148	7.47697	5.75261	7.76842	7.39071	5.54595	7.30244	6.54989	7.87665	6.58753	8.72372	8.00526	9.81253	8.35519	6.31897	6.83073	7.06871	3.31033	6.17453	7.11587	9.77261	7.80105	7.25952	6.79886	7.9287	7.86716	6.35279	8.32105	7.94569	7.96795	8.33957	9.32443	8.5933	7.03445	5.64077	8.49579	7.14889	8.85717	4.7584	7.41435
hsa-miR-185-3p	3.21362	1.80784	2.3965	3.46117	4.56906	4.20327	3.78692	3.16722	2.32077	2.71002	0	3.77686	4.2077	3.75181	3.96098	4.68678	4.07782	3.53384	3.44523	1.89084	4.1048	2.84675	2.40877	4.35644	5.21058	4.34208	4.89529	4.9432	3.45054	3.80107	2.37478	3.41153	2.76911	2.72903	3.97315	4.22568	4.41983	4.50828	2.9181	2.96164	3.80087	3.91523	3.96406	4.30373	3.70919	3.3763	0	3.3563	2.67288
hsa-miR-185-5p	4.03076	1.80784	3.78882	0	5.67869	3.80899	3.60635	4.43025	3.02121	4.41046	4.78607	4.62485	6.47074	4.11438	4.35691	4.77698	4.03051	4.1968	4.62684	5.9783	4.65734	6.75364	4.28324	5.00178	5.09955	6.03723	4.59984	3.87907	4.0355	0	4.83421	3.25952	4.76911	3.53639	3.06626	4.59246	4.23926	4.24525	4.12756	2.46414	6.1228	6.68076	3.64213	4.37773	4.38726	4.25077	5.29327	4.40693	5.0652
hsa-miR-186-5p	11.3368	10.3314	11.135	10.7619	9.66543	11.0353	11.0532	10.8197	11.2337	10.7667	11.0699	10.8671	10.5188	10.5536	10.4465	10.757	10.5478	10.858	10.7349	11.281	11.1499	11.2793	11.8396	11.1403	10.4739	10.1371	10.6684	11.0251	10.6342	9.7318	11.4328	11.2211	10.2716	11.2408	10.6237	9.77946	10.4304	10.9233	11.1373	11.4087	11.4459	11.5137	10.7727	10.5101	10.7047	10.3593	10.8465	10.6069	10.8908
hsa-miR-18a-3p	4.14323	2.80784	2.56642	0	3.32113	4.03726	3.28442	2.84529	3.6427	1.71002	3.46414	2.67732	3.88578	2.32297	3.03498	0.732586	3.82406	4.1188	2.61124	3.89084	3.78287	2.84675	4.82381	3.79896	3.26305	4.90396	3.59984	4.17453	3.69846	0	4.18214	3.33752	0	3.81649	3.38819	3.29968	4.23926	0	3.44166	4.58613	0	5.68076	1.64213	2.22573	2.38726	1.79134	4.47015	3.3563	4.57978
hsa-miR-1908-5p	0.821307	0	4.98146	3.46117	4.02157	3.96511	2.50681	3.43025	1.6427	4.21252	0	4.11789	4.2077	4.68862	4.82158	4.25615	6.49866	4.92616	4.8156	0	3.51984	0	0	4.86546	0	4.65021	4.78426	4.06349	2.77246	0	0	1.0896	3.9915	2.31399	0	4.75911	0	1.92332	2.72546	1.8361	0	0	4.64213	5.39565	0	3.3763	0	4.13391	3.48024
hsa-miR-191-3p	5.45066	4.97777	6.15139	5.68356	4.64306	5.65698	5.94738	4.54573	5.9932	5.82549	3.11622	6.05979	5.2077	5.50517	6.18879	6.3325	5.63142	6.27979	5.49707	5.59128	4.9528	3.84675	5.34737	6.25095	5.36259	3.53473	6.5498	5.56938	5.38127	0	4.54471	5.97224	5.27161	5.37289	5.27572	5.14767	4.23926	5.09325	5.48796	5.43196	5.21591	4.5933	4.44948	5.48207	2.97223	5.11326	4.76971	5.0408	5.25785
hsa-miR-191-5p	16.6917	16.3154	17.0581	16.6674	16.3233	16.836	16.9497	16.6022	16.7451	17.015	16.9584	17.4408	16.4734	17.087	17.1483	17.2333	17.6038	17.3333	17.1561	16.9645	16.5467	16.5494	16.4766	17.1929	16.5122	16.0191	17.087	16.6679	16.9707	16.4109	16.0237	16.9921	16.4742	16.3056	16.7159	16.4351	16.342	16.3678	16.8305	16.8526	16.4313	16.3729	16.8382	16.963	16.0181	16.4935	16.4722	17.068	16.8916
hsa-miR-192-5p	13.9644	12.1621	10.6337	12.0158	11.158	11.3881	10.6471	11.9492	11.8106	11.3827	12.4196	11.6448	12.5042	12.0202	10.3748	11.3501	11.0753	11.7415	11.9618	13.4021	12.5257	13.5485	14.445	11.2522	11.2089	12.0145	11.3041	13.3692	12.344	13.2533	12.6191	12.4469	11.9826	12.5452	12.0782	13.5636	12.3822	12.5771	11.9954	12.0604	13.0832	13.5081	11.2887	11.1889	12.8167	12.6372	13.8545	11.3874	12.7203
hsa-miR-194-5p	5.3291	4.12977	3.92006	5.04613	4.49106	4.56235	4.22302	5.30472	5.17875	4.37298	5.80654	5.26228	5.69313	4.87045	4.75745	5.37644	4.82406	4.34119	4.35447	5.89084	5.40736	6.97603	7.09993	5.02524	4.15613	5.11969	2.84085	5.89537	4.90997	0	5.28167	5.33752	5.57647	5.58701	4.82115	4.86039	4.6543	4.92332	4.34437	5.25932	5.97079	6.8787	4.72959	4.41336	6.29415	4.69823	5.57706	4.54894	4.67288
hsa-miR-195-5p	4.60267	0	3.92006	4.46117	3.78057	3.7241	3.86938	5.16722	5.20342	4.51737	5.01434	3.77686	3.47074	4.59981	4.44098	3.63948	3.21108	4.37514	3.48	2.89084	5.44583	4.16867	4.40877	4.15851	3.77762	5.23517	3.38833	4.87907	4.45054	1.80107	5.07522	4.64419	4.88459	3.53639	3.7667	3.06521	3.6543	3.50828	5.50307	4.80294	4.21591	3.17826	4.54902	5.03308	0	3.96126	4.93963	3.3563	3.48024
hsa-miR-196b-5p	5.24757	3.80784	5.20385	5.68356	5.12849	5.74579	4.60635	5.48915	4.74704	4.07925	5.08305	5.29623	4.47074	5.04879	5.65557	5.28717	4.76748	5.1387	5.48856	4.89084	4.44583	3.43171	4.34737	5.35644	6.18361	3.65021	5.9859	4.54892	4.73594	5.50151	4.54471	5.17706	4.64358	4.85831	5.02046	4.50131	5.7918	4.24525	4.2035	4.60549	2.21591	5.29374	4.10156	5.39565	3.97223	5.3763	4.93963	4.87087	3.67288
hsa-miR-197-3p	7.06923	6.4517	7.91613	7.33564	7.07602	9.91811	7.19131	7.57321	7.26914	7.41046	6.82671	7.4474	7.01506	7.45542	8.58034	6.90251	7.70858	8.40831	7.71339	6.79773	6.72147	7.0562	6.36297	8.61794	7.44438	7.1977	7.78065	6.72342	6.96624	6.55595	6.80105	7.86438	6.73874	6.83756	7.08863	7.34407	6.96172	6.62376	6.47269	7.08403	6.88833	6.50019	7.18129	7.7769	6.77958	5.59869	6.41356	7.50895	6.67288
hsa-miR-199a-5p	7.33306	7.66583	7.36804	7.46117	7.26365	5.87938	7.29191	7.20284	6.77198	7.58449	6.80654	7.02984	7.2077	7.39731	7.13512	7.3908	7.79958	7.42866	7.25007	5.59128	7.01809	4.16867	6.29954	7.32843	7.01028	6.47333	6.41653	7.54376	6.95833	5.70796	6.83421	7.56938	7.3339	7.06888	6.91175	6.79793	4.33237	6.67821	7.17549	6.58124	6.73947	6.95085	7.88053	6.82399	4.38726	6.03926	7.05511	6.7584	6.86271
hsa-miR-199b-5p	4.3759	3.39281	3.3965	3.46117	4.02157	4.65698	3.15889	4.43025	3.22766	2.82549	2.46414	3.03989	4.2077	2.42988	3.17249	3.31755	2.82406	2.85577	3.13208	4.69819	3.00526	3.84675	3.7307	4.42859	3.04066	3.53473	2.59984	4.5071	4.62046	0	4.37478	3.84448	3.50608	4.48392	3.97315	2.43718	1.33237	2.92332	3.67299	4.10459	1.21591	3.5933	2.64213	2.64077	0	0	3.09164	3.54894	2.99481
hsa-miR-19a-3p	6.82693	5.39281	6.17786	6.7831	6.02157	5.96511	6.38596	5.79949	6.11519	6.16945	5.70118	5.54239	6.47074	5.99757	6.00768	5.59057	5.64718	5.92616	6.06496	6.4144	6.79782	6.6541	6.87909	6.45906	6.47806	6.13959	5.90859	6.56938	5.20542	5.88853	6.32898	6.40248	6.18415	6.53639	6.42381	6.25387	6.37676	6.09325	6.14692	6.52133	6.80087	6.29374	5.85158	5.92617	6.94185	5.92062	5.47015	5.92398	5.84281
hsa-miR-19b-3p	8.34291	7.2997	7.66796	7.46117	8.47088	8.08058	7.83388	7.79949	7.66062	7.94523	7.35723	7.01971	7.58622	7.9033	7.79521	7.6274	7.47677	7.44473	7.80878	8.4758	8.15791	9.33056	8.57535	7.55082	8.39821	8.37603	7.48913	8.01955	7.69846	7.68371	8.29364	7.81752	8.25024	8.07776	7.61316	7.95503	8.12678	7.59575	7.89538	8.00785	8.6253	8.43879	7.81205	7.84044	8.61608	7.6617	7.65235	7.44981	8.22747
hsa-miR-200b-3p	3.34487	4.12977	4.3965	4.68356	5.02157	3.80899	3.78692	3.16722	5.17875	4.33451	3.46414	1.86997	4.88578	3.79245	3.52041	4.1249	3.37155	4.59273	2.73154	0	2.51984	0	3.7307	4.6102	3.62562	3.75712	3.59984	4.58956	3.77246	0	3.69671	3.61316	4.18415	3.18846	3.87362	3.97775	3.91733	4.50828	3.67299	4.02053	3.21591	2.5933	3.96406	2.22573	0	0	4.09164	3.63641	2.67288
hsa-miR-204-5p	1.62866	4.97777	4.30339	4.46117	2.32113	4.53768	5.67674	3.43025	4.07566	1.93241	3.11622	4.99925	3.88578	4.32297	4.07061	6.8094	4.76748	4.15833	4.15377	5.21276	3.65734	3.84675	4.778	3.77148	4.45569	3.2717	3.38833	4.0046	4.30852	3.80107	4.18214	2.89695	4.64358	4.25259	4.23619	2.67819	5.91733	4.92332	3.08803	4.39904	5.53784	5.76322	3.96406	4.14327	3.97223	5.3763	5.85717	4.71887	2.25785
hsa-miR-20a-5p	8.1228	7.33141	8.02221	7.08566	7.48101	7.024	7.65365	7.36885	7.4552	8.01987	7.28615	7.5353	7.47074	7.42988	8.52523	7.17553	8.36679	7.94606	7.78117	7.77348	7.80524	7.6541	7.48202	8.24597	7.27587	7.15922	7.47132	7.06349	7.02797	5.2605	7.46224	8.09522	7.35407	7.35839	7.37914	7.56646	5.94708	7.28087	7.33596	7.67817	6.85976	7.08515	7.96406	7.73528	6.87912	6.59869	6.44213	7.24938	7.44107
hsa-miR-20b-5p	3.7282	1.80784	3.20385	1.87621	4.9061	2.13914	3.28442	1.84529	3.02121	2.71002	2.46414	3.3294	4.2077	2.20749	1.88298	3.53994	2.29355	3.2708	3.99457	4.89084	3.78287	5.01667	4.8682	3.20033	2.04066	4.53473	0.725369	3.22699	2.90997	0	4.69671	3.89695	3.50608	4.42947	1.65122	3.43718	4.33237	0	3.56196	4.60549	4.02326	4.40066	1.64213	1.86316	4.97223	3.96126	4.57706	4.00838	3.48024
hsa-miR-21-3p	7.85748	7.87393	8.34778	8.7831	8.35456	8.54544	8.86688	9.0252	8.17252	8.49356	9.07464	7.00952	8.80464	7.94445	8.22283	6.79867	7.00014	9.17046	7.95805	6.69819	8.83815	6.54719	8.70339	9.16842	8.86932	9.2048	7.95419	7.78158	7.20542	8.80107	8.61319	8.64419	8.23943	7.83756	9.08028	9.65547	7.87926	8.83021	9.34646	8.05967	8.90241	7.93315	9.11786	8.0388	8.63519	8.47082	7.80313	8.15257	7.59175
hsa-miR-21-5p	13.8795	13.7485	13.9267	14.2085	14.5242	14.344	14.501	13.951	13.9227	14.1885	13.8275	13.8065	14.0374	13.8637	14.4562	13.5462	13.9809	14.4771	14.0775	13.2837	13.8331	13.5085	14.0579	14.5723	14.3365	14.3771	14.2824	14.3531	13.9069	13.9135	13.947	14.5878	14.041	13.8144	14.6552	14.6765	14.5321	14.127	14.4087	14.0723	13.7434	13.9577	14.5669	13.8507	13.8834	13.8761	13.5607	14.4381	14.236
hsa-miR-210-3p	6.41376	4.39281	3.64443	2.87621	5.45042	4.29441	4.86938	1.84529	5.10213	4.25434	4.41168	4.67732	5.0557	4.92631	4.38548	5.40501	4.03051	3.70376	5.24755	6.93523	5.44583	7.30618	6.82381	5.5946	5.45569	5.92705	5.69499	6.46403	5.64036	0	7.44087	5.06688	4.18415	5.7514	5.45858	5.42069	4.6543	3.50828	4.8723	5.96913	6.30337	6.29374	4.81205	5.95062	5.55719	5.79134	5.8141	4.9065	6.40081
hsa-miR-2110	3.52175	3.39281	4.15139	3.46117	6.12849	4.03726	4.02138	3.84529	3.4907	3.58449	0	4.45493	4.69313	4.99757	4.73542	4.37644	4.48117	3.99327	4.17514	5.21276	3.78287	0	3.40877	3.62563	4.04066	3.65021	4.34986	3.0046	1.45054	7.01052	1.37478	3.33752	3.50608	2.31399	2.87362	5.40401	4.13972	3.50828	3.72546	2.46414	3.80087	4.17826	3.96406	4.37773	2.97223	4.11326	0	3.63641	2.99481
hsa-miR-215-5p	7.17886	7.78512	6.87223	5.87621	7.26365	4.65698	6.28442	7.71566	7.53023	7.2072	6.53943	6.57041	7.34521	7.55326	4.84234	6.28717	6.4274	7.61421	4.68759	9.05071	6.2423	8.4761	8.74565	6.08227	7.97139	5.47333	7.08877	7.06349	2.62046	6.55595	6.01864	6.97834	7.72331	7.09535	6.55812	6.19692	8.46165	9.42317	6.4338	8.28356	6.7705	9.12468	6.68652	8.08371	8.68188	6.3763	9.93963	6.76811	8.10751
hsa-miR-22-3p	15.1363	14.2828	15.0207	14.6755	13.7967	14.1314	14.9935	14.6834	14.9433	14.8596	14.7412	14.4936	14.9767	14.4202	14.2863	14.6669	14.2828	14.671	14.728	15.0409	14.9183	15.1146	15.5458	15.045	14.2646	14.374	14.4825	15.0494	14.807	13.7915	15.2845	15.1835	14.109	15.1697	14.7591	14.0931	14.5675	14.7889	14.8609	15.1207	15.0923	15.253	14.7393	14.5779	14.7284	14.7167	14.6315	14.7374	14.8501
hsa-miR-22-5p	4.03076	0	3.30339	2.87621	3.64306	1.48706	3.02138	4.54573	3.96463	3.93241	4.24175	3.3294	1.88578	2.32297	1.03498	3.05451	1.70858	3.1188	2.99457	0	4.44583	4.43171	4.21612	3.11544	3.26305	5.07905	3.66397	3.58956	2.25789	6.12299	3.69671	3.33752	2.18415	3.81649	3.65122	2.67819	3.6543	4.50828	3.50306	3.6246	4.53784	5.5933	3.44948	3.0558	2.97223	2.3763	0.769708	3.00838	3.48024
hsa-miR-221-3p	9.90943	10.3509	10.3131	10.18	10.7167	10.8193	10.1913	9.96164	10.2201	10.4436	9.9445	10.2634	10.3493	10.526	10.7229	10.6022	10.3787	10.019	10.2753	9.8097	10.6073	9.94478	9.82522	11.0254	10.5418	11.0765	10.2593	10.76	10.1025	8.58243	10.239	10.1503	10.3591	9.85056	10.159	10.3539	10.2196	10.3156	10.0286	10.1135	10.1077	9.82692	10.5625	10.7918	9.77958	10.175	9.61206	10.2769	9.97209
hsa-miR-221-5p	6.24757	7.85224	7.33314	7.75885	6.82893	5.99259	6.92828	5.60018	6.63366	6.91296	6.48968	6.15537	7.0557	6.91715	6.36411	5.61523	6.49866	7.64932	6.33561	3.89084	6.59023	4.43171	6.43852	7.04259	6.97926	5.75712	6.24893	5.82903	5.71732	7.08647	6.69671	7.08395	7.18415	6.34374	7.22613	5.94353	3.50229	7.28087	6.52543	6.60549	6.42536	4.17826	6.99968	6.16433	5.55719	6.34593	4.57706	6.14886	5.62708
hsa-miR-222-3p	10.6629	11.6549	11.0583	11.6641	11.6836	11.445	11.4397	11.5318	11.8909	10.8829	11.4163	11.5259	11.7942	11.373	11.8775	12.3225	11.5457	11.7027	11.5904	10.3087	11.6619	10.0707	10.2873	11.2435	12.1453	11.7055	12.0611	12.1787	11.3805	10.9406	10.9446	10.9627	11.8016	10.8641	11.8382	11.3552	11.5594	11.1783	11.3325	12.0041	10.7296	10.3615	12.0923	11.825	11.2265	11.7772	10.9271	11.6756	11.2361
hsa-miR-223-3p	11.929	10.6023	11.681	11.2877	11.8044	12.5956	11.3478	11.4199	11.8614	11.795	11.0132	10.8401	11.5458	10.5858	11.149	10.7473	10.7263	11.24	10.897	12.0098	11.4231	11.384	12.1648	12.4666	11.4113	11.2638	10.6408	11.0293	10.8626	9.86716	11.3846	12.1759	11.6659	11.7354	10.9219	10.7434	10.767	11.5744	11.5905	11.8476	11.1031	11.4942	11.2587	10.8668	10.4425	9.91804	10.0271	11.1273	11.1415
hsa-miR-223-5p	7.47594	8.09325	7.2357	7.49092	7.8447	8.28703	6.95684	7.69078	7.15998	7.42883	6.94219	7.245	7.95187	7.32643	7.45115	7.51395	7.09516	7.4124	7.3189	7.3171	7.33746	7.01667	7.0812	7.80236	7.65537	8.12469	8.28251	7.52293	7.29603	7.29292	6.95974	7.75138	7.93904	6.79512	7.78736	8.16262	7.53204	7.85406	7.35273	7.33667	6.46384	7.47594	7.97305	7.90755	7.91083	6.74553	6.55107	7.44376	7.19645
hsa-miR-224-5p	7.5695	8.23411	8.58385	5.68356	8.16034	9.2429	7.86436	8.6845	7.12167	8.32227	6.2567	6.20982	7.83997	8.06132	7.37127	6.3473	7.57895	8.21097	7.04768	5.79773	6.44584	5.6541	5.8682	7.73993	9.00259	8.13464	5.89529	6.75949	8.13704	0	7.28167	8.3136	8.16143	7.87369	6.57406	8.06786	8.89079	8.83021	6.59053	6.82788	7.0488	3.17826	8.85645	7.77005	6.34146	7.00079	6.55107	7.13391	6.93967
hsa-miR-2355-5p	4.7282	1.80784	4.44089	4.87621	3.64306	3.43459	5.05701	3.65265	4.71309	3.93241	4.41168	3.67732	4.88578	3.98008	4.75745	4.1249	4.48117	4.53384	4.42753	4.4758	4.1048	1.84675	4.14574	4.5629	3.77762	2.53473	3.84085	5.03435	3.0355	0	3.95974	5.65945	4.50608	4.63592	5.52569	4.75911	3.6543	3.50828	4.50307	4.5466	1.21591	5.50019	3.96406	4.1002	3.38726	4.3763	0	4.50314	2.25785
hsa-miR-2392	5.28074	7.4517	6.38518	4.87621	6.49106	5.97432	6.3999	4.75218	5.4293	6.97054	4.82671	4.67732	8.0557	6.74665	6.38548	5.84111	5.40902	4.53384	6.42307	5.79773	5.19791	4.84675	4.57869	6.32843	6.93143	7.24439	7.17383	4.66756	5.06525	5.123	4.69671	5.89695	7.20652	4.37289	4.92424	7.25387	6.26311	4.50828	5.4259	4.44276	4.02326	2.5933	5.85158	6.38672	7.00197	6.28319	5.85717	6.1928	6.45424
hsa-miR-23a-3p	9.09976	8.54931	9.67611	9.29406	9.01462	9.85961	9.14033	9.0252	9.39358	9.13768	9.26227	9.16229	8.88578	8.46958	8.8307	8.8227	8.89676	9.6441	8.79935	9.29171	9.20634	8.2043	8.99873	9.34484	8.94354	9.11719	8.68344	8.7257	8.71966	8.98098	9.05426	9.09382	8.98505	9.08438	8.82449	8.57207	8.4304	8.91201	9.27675	8.95221	9.19319	8.79297	9.1138	8.45882	7.61608	8.02016	8.40633	8.77053	8.95829
hsa-miR-23b-3p	7.79285	7.39281	8.56642	7.63109	8.52081	10.1086	7.89913	8.03512	7.70015	8.02592	7.55161	7.75871	7.24333	7.9422	8.54278	7.46051	8.68777	9.05085	8.79245	6.13876	7.49253	6.30618	6.71862	9.21315	6.94755	7.58639	7.93482	7.1611	7.61041	7.99089	7.32898	8.09802	8.22854	7.6299	7.56611	7.68165	6.63615	7.62376	7.70601	7.46148	6.21591	6.95085	7.99968	7.91689	7.00197	7.11326	7.58989	8.02468	7.53087
hsa-miR-24-2-5p	4.40627	4.12977	4.25448	3.46117	4.12849	3.80899	5.09177	4.54573	4.74704	4.79748	4.86624	4.11789	3.88578	4.42988	5.17249	4.68678	5.07782	5.30643	4.11005	3.89084	3.51984	1.84675	3.28324	4.39297	3.45569	4.70465	4.38833	5.0046	5.33318	0	3.95974	5.31842	3.9915	4.48392	5.02046	2.14767	2.91733	4.73068	4.67299	5.0491	3.21591	2.5933	4.96406	4.34121	2.38726	4.3763	4.09164	4.24938	3.99481
hsa-miR-24-3p	4.57619	5.50828	4.92006	6.12413	7.12849	4.6797	5.15889	5.88969	5.67833	6.30496	4.94219	5.26228	7.52963	4.92631	5.53324	5.70986	4.82406	4.23428	4.78812	5.59128	5.55546	6.37031	4.52425	5.48043	6.60544	7.06871	5.02305	5.52816	5.33318	0	6.01864	5.33752	6.9915	5.51039	4.82115	5.74593	4.41983	4.92332	6.34437	4.0491	6.02326	5.76322	5.44948	5.26526	5.0877	5.49178	5.16202	5.99189	5.25785
hsa-miR-25-3p	13.6953	12.9778	12.3146	12.8783	12.8062	12.8259	12.5838	13.0988	12.6165	12.8088	12.8156	12.497	13.0682	12.5272	12.0416	12.7622	12.0292	12.1784	13.0827	14.1018	13.5018	14.5441	14.6333	12.5721	13.2452	13.2144	12.5543	12.8837	12.8502	13.8563	13.8431	12.7283	13.0676	13.5178	13.1813	13.2063	13.7513	13.4351	12.8561	13.3389	14.1948	14.5825	12.7539	12.4673	14.198	13.435	13.5552	12.5511	13.0682
hsa-miR-25-5p	4.31316	4.39281	3.56642	4.19813	3.12849	4.70207	2.50681	4.65265	4.45006	3.93241	2.24175	4.26228	4.69313	4.17711	4.20491	5.28717	4.82406	3.1188	4.71704	5.21276	3.36783	1.84675	4.57869	2.46336	3.45569	2.94977	4.59984	4.32653	4.25789	0	5.18214	3.25952	3.9915	3.97696	3.87362	4.43718	1.33237	3.50828	3.31042	4.6246	4.91635	6.11686	3.96406	4.34121	4.19462	4.49178	4.22914	4.40693	3.67288
hsa-miR-26a-5p	16.2991	15.5801	16.5654	16.0272	15.582	15.6511	16.3726	15.8904	16.5236	15.8077	16.2304	16.2064	15.7355	15.9572	15.9764	16.0548	16.2913	16.444	15.9767	15.2996	16.0046	15.0914	15.6053	16.2261	15.6801	15.3159	15.9483	15.9738	15.7798	14.8594	15.6813	16.5171	15.7304	15.9485	15.9702	15.2034	15.2641	15.7412	16.2712	16.2642	15.547	15.1166	16.2797	15.8909	14.9723	15.1879	15.4588	15.9434	15.9931
hsa-miR-26b-3p	5.69167	0	6.17786	5.68356	4.96499	5.69093	6.66524	5.16722	5.69581	5.91947	5.24175	5.93605	5.0557	5.14609	6.14769	5.31755	5.8918	6.80063	5.48	5.59128	6.38773	3.84675	6.16366	6.67837	4.70362	4.59362	4.66397	5.75949	4.30852	0	6.41918	6.00846	5.35407	5.83756	4.92424	4.56271	5.33237	2.92332	5.80075	5.36536	5.46384	4.91523	5.54902	5.30373	4.38726	3.3763	5.29327	4.94126	4.99481
hsa-miR-26b-5p	12.7325	12.8142	13.0354	12.815	13.3262	13.4757	13.3057	12.7823	13.134	13.2132	13.1584	13.0576	12.6794	13.2902	13.3465	12.9749	12.9945	13.0086	12.9388	12.707	13.0061	12.9837	12.6142	13.7659	13.1757	12.9244	13.4516	12.912	12.8016	12.7465	12.5118	12.9173	13.2455	12.6061	12.5923	13.1141	12.9762	12.6504	13.1436	12.9581	12.7017	12.7264	13.028	13.4477	12.7881	12.4638	12.5246	12.9583	13.1088
hsa-miR-27a-3p	8.89411	8.85224	9.00937	9.12413	8.31549	8.72136	9.1486	9.39219	9.55079	8.72682	9.2455	8.55996	9.14316	8.16942	8.0881	8.75218	8.40902	8.83152	8.4551	9.23069	9.28006	8.89114	9.48914	9.30226	8.09232	8.90396	7.96377	8.9432	8.63789	7.68371	9.6694	9.13672	8.13835	8.91638	9.01463	7.96074	8.39306	9.59575	9.16366	9.22686	9.43023	9.57629	8.9229	8.52951	8.90297	8.8788	8.91945	8.73382	8.84781
hsa-miR-27b-3p	13.6955	13.583	13.2878	13.4928	12.9593	12.8531	13.3111	13.9046	13.1166	13.201	13.7742	13.5218	13.8327	13.5456	13.3312	13.4694	13.7592	13.6603	13.527	14.0166	13.6958	13.581	14.0677	13.6151	12.68	13.3277	13.4021	13.8449	13.7761	13.1723	13.197	13.6004	13.3516	13.0224	13.5572	13.4173	13.5849	13.8647	13.6214	13.1822	13.4296	13.6506	13.6798	13.4182	13.5332	13.6009	13.9195	13.5146	13.7407
hsa-miR-27b-5p	5.19635	6.50828	5.66328	2.87621	6.04906	5.43459	5.05701	5.65265	5.02121	4.82549	4.24175	5.57041	5.47074	5.76208	6.42042	5.86187	5.86509	5.85577	5.48856	4.89084	5.28537	5.16867	2.82381	5.7784	6.31368	5.1977	6.67179	5.9588	5.75432	5.80107	5.54471	5.54903	6.31343	5.08658	5.62085	6.41238	5.75863	4.24525	4.80075	4.97659	5.21591	4.40066	5.28598	6.35043	4.8467	5.79134	4.09164	5.3303	5.31674
hsa-miR-28-3p	13.4108	13.574	13.6391	13.6109	14.0897	13.7327	13.2567	13.3664	13.2955	13.3298	13.496	13.5463	13.403	13.708	14.0446	13.5316	13.458	13.943	13.4725	12.6917	13.2399	12.5324	13.1956	13.3105	14.1733	13.6031	13.9415	13.5676	13.1964	13.6112	12.6515	13.4486	13.6765	13.0746	13.7967	14.6557	13.2154	13.307	13.5586	13.2555	13.0594	12.7168	13.6964	13.7954	13.1682	13.2899	12.7715	13.5571	13.3672
hsa-miR-28-5p	9.05253	8.72671	9.26223	8.65757	9.03538	8.87569	9.1152	8.39219	9.22013	8.64666	8.76531	8.97325	8.94106	9.18286	9.38548	9.07688	8.90826	9.11253	8.73064	7.59128	8.59451	7.43171	8.52425	8.76975	9.08869	8.63627	9.30531	9.23982	8.75888	6.60842	8.28167	9.26452	9.04213	8.97696	8.95805	8.85886	8.13972	8.36626	9.01745	9.01782	7.99727	8.14789	8.96856	9.09883	7.61608	8.32272	7.98888	8.7437	9.00827
hsa-miR-29a-3p	8.29501	6.97777	7.74523	7.63109	7.29841	8.32356	8.02589	8.2965	8.63366	7.65253	8.50228	6.84725	7.79267	6.49289	6.20491	6.40501	6.68586	7.0574	6.91423	8.69819	7.65734	8.57467	9.70032	8.10584	7.28858	8.66057	7.31533	8.18451	7.38127	6.32463	9.40269	8.37962	6.9915	8.16782	8.03205	7.00565	8.30391	8.24525	7.71576	8.55534	8.20459	8.58198	7.34257	7.24068	8.05969	7.6617	8.63389	7.37549	8.03921
hsa-miR-29b-3p	4.57619	1.80784	2.56642	4.19813	1.32113	4.80899	3.02138	2.84529	4.71309	4.67964	5.21138	3.3294	2.88578	1.42988	2.29802	2.53994	1.44555	3.53384	4.76011	4.21276	4.9528	5.75364	5.99373	3.20033	3.26305	3.94977	0	3.74157	3.62046	5.38603	6.12967	3.54903	3.50608	4.18846	2.38819	3.06521	4.03281	3.92332	3.44166	4.6246	6.38583	6.29374	2.96406	2.22573	3.38726	5.03926	4.57706	3.71887	4.57978
hsa-miR-29c-3p	6.54241	5.50828	5.58632	5.46117	4.49106	6.38014	6.15889	5.36885	6.55918	5.69491	5.96057	4.72795	5.34521	5.54139	4.97984	5.43303	5.18971	4.73024	5.47139	6.28315	6.22028	7.16867	7.32365	5.53047	4.70362	5.70465	5.1848	5.86258	5.40473	4.97099	6.83421	6.04379	5.18415	6.80585	5.84762	4.02214	5.54182	6.83021	6.11777	6.60067	7.282	6.68076	4.72959	4.61039	6.91083	5.8788	5.89899	5.47968	6.19645
hsa-miR-301a-3p	9.32016	8.36243	9.00383	8.87621	8.65653	8.89281	8.93786	8.66547	9.28944	9.02139	8.78091	9.35781	8.70596	9.29848	9.40218	9.36194	9.36441	8.9161	8.86	8.35027	9.17519	7.97603	8.83224	9.439	9.00259	8.22123	9.33146	9.17619	8.77921	8.06785	8.56461	9.36339	8.92562	8.7597	8.39269	8.26777	8.51724	8.24525	9.15052	9.41078	8.61679	7.82212	9.32863	9.28702	8.81353	8.47082	8.47707	9.10928	8.79182
hsa-miR-301b	6.3682	5.50828	6.40773	5.68356	5.60654	5.48706	6.73288	5.75218	6.65169	6.98304	5.11622	5.93605	6.0557	5.73105	5.39956	6.74381	6.36203	5.66312	5.69501	5.06076	6.85612	4.6541	6.16366	7.34017	5.77762	5.70465	6.34986	6.07785	5.40473	0	6.66018	6.89695	5.70771	6.26819	5.15372	4.83573	4.7918	5.62376	6.07797	6.57635	5.53784	0	6.31455	5.90129	4.8467	4.69823	5.22914	5.67823	5.92081
hsa-miR-30a-3p	5.64149	4.80784	5.32723	3.46117	5.9061	4.82945	5.3999	6.95382	5.27497	5.35387	5.56368	5.07942	5.88578	4.70999	4.35691	4.94204	4.51594	4.6768	4.3165	5.06076	5.1521	5.75364	6.10921	4.98991	5.15613	6.1977	4.14041	5.74156	5.9741	5.97099	4.95974	4.64419	5.57647	5.40146	5.23619	6.23514	5.97622	6.24525	5.44166	5.22216	4.53784	5.76322	5.99968	4.86316	5.19462	4.59869	4.76971	4.45584	4.67288
hsa-miR-30a-5p	10.0716	10.1207	9.24668	10.1891	9.81899	9.14527	9.93547	11.2268	10.2721	9.90149	10.9171	9.81395	10.6035	9.88462	8.62145	9.80405	8.67051	8.81151	8.68107	11.2938	10.0882	10.6248	11.2215	8.91261	9.91513	11.147	9.139	10.913	10.2029	10.3128	11.666	9.84532	9.65583	9.66124	10.2586	10.0317	11.3478	11.2498	10.9986	10.237	11.1745	11.4759	10.4398	9.9821	11.3588	10.6305	10.9156	9.76569	10.4851
hsa-miR-30b-5p	9.53813	8.09325	9.40212	8.52006	9.1445	9.07952	9.70929	8.86766	9.52901	9.43112	8.94219	8.97849	8.40934	9.25734	10.4516	9.05451	9.83701	10.2876	8.90146	8.11965	8.70966	7.99649	8.83783	9.93986	8.68451	8.68109	8.94615	8.77939	8.77697	7.77835	8.75849	9.63649	8.91886	9.03281	8.66989	8.82167	8.23323	8.6915	9.11532	9.39557	8.40573	8.42619	8.85158	9.34812	8.26991	8.34592	8.11844	8.84586	8.9017
hsa-miR-30c-1-3p	5.62866	5.26728	5.73635	5.7831	6.17912	5.93709	5.28442	5.54573	5.5687	5.60079	4.86624	5.36182	5.97324	6.30201	6.49442	6.03637	5.83787	5.25266	5.93317	4.4758	5.1521	4.16867	5.55173	5.42859	5.40989	6.50436	6.86151	6.26513	4.73594	0	5.69671	5.71895	6.13835	5.37289	5.89915	6.65017	5.5803	5.09325	5.95153	5.81962	5.21591	4.5933	5.77141	6.07817	4.8467	4.49178	5.35467	5.92398	5.71728
hsa-miR-30c-5p	11.3127	10.4408	11.4395	11.066	11.1445	10.7859	11.9518	11.1728	11.6709	11.6091	10.9503	11.251	11.0582	11.3396	11.8803	11.0358	11.7168	11.8707	11.0707	9.9783	11.0371	10.0016	10.3975	11.6052	10.9968	10.6107	11.1195	11.2741	11.195	9.70796	10.9784	11.7353	11.1856	11.3262	11.4719	10.452	10.2601	10.5083	11.0858	11.5493	10.3858	9.99418	11.5475	11.0851	10.3473	10.3838	10.2353	11.2653	11.077
hsa-miR-30d-3p	5.08809	5.97777	5.52578	5.04613	4.64306	4.65698	6.22302	4.65265	5.69581	5.86652	4.97872	5.26228	5.58622	4.92631	5.38548	5.3473	5.4274	5.15833	4.8156	4.4758	5.05589	2.84675	5.14574	5.35644	5.88196	5.44162	4.94776	5.77719	5.30852	4.80107	4.37478	5.56533	3.76911	5.08658	5.49253	3.7851	4.91733	4.24525	5.51802	5.5466	5.38583	5.05273	2.64213	5.14327	2.97223	6.07674	5.09164	5.1928	4.13232
hsa-miR-30d-5p	13.1157	13.6836	13.1558	13.6407	13.468	13.7872	13.6143	13.7957	13.2247	13.1361	13.8124	13.5437	13.2477	13.751	13.7998	13.7563	13.3792	13.4319	13.5278	13.3736	13.8725	13.4929	13.1801	13.1564	13.7264	13.7548	13.9269	13.6172	13.5854	14.2094	13.4489	13.1183	13.8039	12.9869	13.4524	13.4169	13.5099	13.6601	13.8485	13.1558	13.8611	13.3573	13.6918	13.8363	13.4621	13.5437	13.1308	13.5374	13.5042
hsa-miR-30e-3p	10.0277	9.69049	10.168	10.4154	10.4427	9.74175	9.90525	10.4819	9.82559	10.1002	10.1626	9.23847	9.98906	9.76336	9.74372	9.42607	9.34158	10.0183	9.45564	8.99936	10.0973	8.74156	9.72919	10.053	10.5485	10.088	10.0269	9.58454	8.98387	10.2646	9.14957	9.95456	9.99793	9.52831	10.3712	10.8512	9.49727	9.79984	10.1648	9.76738	9.48737	9.01115	10.4908	9.67602	9.54208	9.22597	9.20016	9.47672	9.6154
hsa-miR-30e-5p	12.4121	12.1093	12.1994	12.4928	11.8704	12.0744	12.5004	12.6307	12.2439	11.9474	12.3639	12.1677	12.4848	12.2049	12.1413	12.2199	12.0184	12.3496	12.3777	12.5401	12.808	12.4364	12.4424	12.1155	12.1014	12.1359	12.2455	12.6606	12.0962	11.7184	12.2405	12.3785	12.1038	12.1642	12.3421	11.8033	12.1006	12.4102	12.6371	12.2827	12.4856	12.6499	12.6662	12.1375	12.2828	12.0014	11.9552	12.3393	12.4177
hsa-miR-3135b	7.79572	8.79653	7.59617	7.75885	7.86803	7.15138	7.65946	7.62665	7.50068	8.60887	7.33627	7.87559	8.15256	8.72712	7.71868	7.70986	8.23476	7.56359	8.06639	8.23069	7.53776	8.11353	7.98368	6.98692	8.0704	7.37603	7.19025	7.43645	8.24495	7.90959	7.6036	7.28435	8.76911	7.08658	7.97915	7.71922	7.30965	7.24525	6.61159	6.90806	7.42536	6.11686	7.67555	8.03022	7.14215	6.67398	8.22092	7.43159	7.79183
hsa-miR-3138	2.82131	4.39281	3.09694	3.46117	1.9061	2.00163	3.94738	4.01522	2.6427	4.07925	0	4.86997	3.88578	4.32297	4.64379	4.94204	4.12362	3.1968	4.04188	0	4.59023	4.43171	1.40877	3.02524	5.54316	3.94977	4.0946	3.58956	3.45054	0	2.37478	1.89695	5.35407	1.31399	4.06626	4.37007	3.6543	1.92332	3.56196	2.76899	3.80087	4.91523	3.81205	4.26526	1.38726	4.79134	4.35467	4.00838	4.37332
hsa-miR-3168	9.78058	12.214	9.9308	11.5522	10.8349	8.24956	14.6212	10.3767	15.1716	10.3617	11.5908	9.04489	16.1378	8.65043	7.4646	10.0122	7.84472	6.64236	9.72521	13.7484	10.54	15.7259	12.6618	13.0142	10.4599	10.7547	9.15303	9.32953	9.85035	12.634	16.4407	11.6856	10.8117	14.4554	9.10244	9.08366	12.8877	12.4605	8.62028	10.7273	11.1903	16.5976	9.75065	9.07678	12.976	14.7475	11.6292	9.15628	14.1734
hsa-miR-3174	3.62866	3.80784	4.04035	1.87621	4.49106	4.07202	3.69946	4.01522	2.12813	3.29498	3.74425	3.77686	3.88578	3.98008	4.96098	4.31755	4.29355	3.47244	4.44523	1.89084	4.65734	2.84675	2.63116	2.7149	3.62562	4.65021	5.58335	3.41964	3.84285	4.123	1.37478	4.13399	3.18415	2.89895	4.15372	5.69199	3.33237	0	4.69946	4.15803	1.21591	0	3.44948	4.67051	3.38726	4.25077	0	2.71887	4.13232
hsa-miR-3177-3p	3.67929	4.39281	3.09694	0	2.64306	3.58659	3.28442	1.84529	2.32077	2.71002	4.18035	4.26228	3.47074	3.14609	3.66725	3.98051	3.93098	3.59273	3.67264	3.89084	4.00526	3.43171	0	2.7149	4.54316	2.53473	4.1848	0.419637	4.0355	0	2.37478	3.33752	4.9915	2.53639	4.06626	3.50131	2.91733	0	3.44166	2.6986	2.80087	3.17826	3.64213	4.81069	4.8467	0	4.35467	3.54894	0
hsa-miR-3184-5p	2.90877	3.80784	3.56642	3.46117	2.9061	4.40762	3.02138	4.01522	3.84434	2.82549	4.90472	3.57041	4.47074	2.62253	3.03498	3.05451	1.93098	3.85577	2.89504	5.06076	4.19791	4.43171	5.07173	3.95369	2.04066	5.07905	3.89529	3.66757	3.77246	5.38603	4.83421	3.54903	0	2.89895	4.65122	0.977749	4.13972	4.24525	4.16603	3.8361	3.53784	4.17826	3.64213	3.81069	3.38726	2.79134	4.6766	3.71887	3.99481
hsa-miR-32-5p	7.63188	4.12977	5.56642	5.19813	4.78057	4.88916	6.09177	5.97457	6.21559	5.35387	5.58753	5.36182	5.34521	3.87045	3.4135	5.61523	3.37155	3.47244	6.14838	7.06076	7.0308	8.0562	8.59199	5.44608	4.91513	5.03723	3.66397	5.17453	5.57982	0	7.91394	6.34699	4.9915	6.93848	5.94891	4.6216	6.33237	6.92332	5.97339	6.84428	8.32443	7.89708	3.44948	4.18509	6.67267	4.8788	6.41356	5.1928	6.69525
hsa-miR-320a	11.2053	11.3624	11.0707	11.6559	11.8075	11.5815	11.0598	11.616	11.118	11.6422	11.7479	11.4833	11.3162	11.7068	11.8198	12.2219	11.8747	11.2848	12.0025	11.1221	11.4171	11.2348	11.0399	12.3262	11.6965	11.6912	12.2527	12.0041	11.731	10.5693	12.2061	11.3378	11.6374	10.8408	11.9258	12.0383	11.9383	11.7226	10.8007	11.0462	11.558	10.977	11.5263	11.8504	11.0383	11.7871	10.9645	11.5269	11.0205
hsa-miR-323a-3p	4.57619	4.97777	5.98146	3.87621	6.71345	5.27962	4.82874	3.16722	5.4907	5.568	4.61099	4.11789	1.88578	5.40389	4.80052	3.73259	5.05436	5.28873	4.17514	2.89084	3.19791	4.16867	2.82381	4.15851	2.04066	5.15922	4.59984	3.81196	5.45054	5.70796	4.18214	2.67456	4.64358	4.97696	3.7667	6.36145	4.6543	1.92332	4.8723	4.58613	2.21591	4.17826	2.64213	5.54766	0	1.79134	4.57706	4.71887	4.13232
hsa-miR-323b-3p	5.03076	6.20016	7.63012	6.7831	7.71345	6.74579	7.10034	4.43025	6.91323	6.10233	5.53943	6.81248	5.2077	7.37072	6.19687	6.31755	7.14599	6.63538	6.36381	6.28315	5.36783	6.97603	5.7307	5.21059	5.40989	5.83241	6.55826	5.25253	7.32705	7.01052	5.7671	4.76202	7.01704	7.16366	5.7667	7.09149	7.01887	4.73068	6.54016	5.71652	5.21591	0	3.81205	7.44812	4.8467	6.40605	6.70045	6.72885	6.19645
hsa-miR-326	4.3759	3.39281	4.88835	5.04613	4.64306	6.17955	4.34331	4.65265	5.07566	5.21252	0	4.45493	2.88578	4.40389	5.38548	4.31755	4.87851	5.86774	5.00655	3.89084	4.72147	1.84675	0.823807	6.03683	4.62562	3.2717	3.72537	4.5071	4.84285	0	3.37478	5.06688	5.18415	4.97696	4.38819	4.50131	0	5.24525	4.69946	4.6246	3.21591	0	4.54902	5.14327	3.70919	4.8788	0	2.87087	3.99481
hsa-miR-328-3p	7.61247	7.2997	7.24825	6.46117	7.38722	8.59109	7.35051	7.14907	7.82857	7.22834	7.04049	7.09879	7.09523	7.70999	7.79521	7.59057	7.85154	7.53384	7.36845	7.02012	7.30643	5.93421	6.49623	7.9704	7.73182	7.31609	7.41187	7.98569	8.06892	5.2605	7.46224	7.66703	7.41297	7.24473	7.34239	6.86039	7.27488	6.44688	7.13727	7.81338	6.34519	6.91523	7.31455	7.7388	7.00197	7.13119	6.22914	7.11119	6.28759
hsa-miR-330-3p	6.50079	7.0173	6.69112	6.57665	7.25187	6.2266	6.89913	6.27156	6.6871	6.60079	6.43815	6.75261	7.17118	6.91715	6.71868	6.78787	6.58305	6.87369	6.48856	7.02012	7.09273	5.01667	5.57869	6.78529	6.64552	6.47333	6.90196	6.29	6.02039	6.60842	5.95974	6.68951	7.29267	6.25259	6.47565	6.57021	6.08726	7.0526	6.59758	6.60067	5.1228	6.11686	6.22709	6.67051	6.55719	5.3149	5.47015	6.41931	5.57978
hsa-miR-335-3p	7.66051	6.39281	7.92788	5.46117	6.36553	6.90852	7.17519	6.65265	7.70448	6.69491	6.84661	6.71546	5.34521	6.67237	6.4273	6.44683	5.95651	6.89724	5.93317	4.69819	6.42673	5.16867	5.28324	7.93987	6.96349	5.8805	5.67956	6.73252	6.24495	6.32463	7.28167	7.71531	6.3936	6.99582	6.25609	5.79793	6.08726	6.56718	6.71252	6.94653	6.70776	6.05273	6.68652	6.26526	5.97223	6.14889	5.16202	5.9065	5.80217
hsa-miR-335-5p	9.92787	9.18288	10.47	9.52006	9.21292	8.99825	9.11731	9.44148	9.96733	9.4804	9.6722	9.31084	9.40934	9.14805	9.20991	9.30244	9.20177	9.1424	8.97566	8.96765	9.32461	8.23906	9.22041	9.35471	9.70125	8.90105	8.54129	9.2173	9.22037	8.2605	10.5169	9.8403	9.42732	9.72197	8.84105	8.65017	8.82021	9.15214	8.66965	9.32285	8.75507	9.17826	9.16177	9.36187	8.72711	8.50558	8.36216	8.60694	8.81754
hsa-miR-338-5p	3.34487	2.80784	4.15139	3.87621	2.64306	3.07202	2.02138	2.43025	3.32077	3.93241	4.30065	3.19189	1.88578	2.20749	2.29802	3.73259	2.12362	2.94888	3.25761	3.89084	4.44583	5.43171	4.34737	4.00178	4.45569	3.65021	1.72537	3.74157	4.0355	0	4.37478	3.99649	3.18415	3.81649	5.15372	2.88464	3.13972	4.50828	4.31042	3.8361	5.46384	4.40066	3.81205	3.37773	0	4.69823	3.35467	4.07251	3.84281
hsa-miR-339-3p	6.00122	6.66583	5.96635	6.04613	5.17912	5.86953	5.72182	5.36885	6.4188	5.94523	5.24175	6.15537	5.0557	6.14609	6.25222	6.09014	6.4365	6.30643	6.11559	5.21276	5.00526	6.16867	6.74267	5.91025	5.81325	4.70465	5.36922	5.41964	5.40473	5.70796	5.7671	5.73345	5.57647	5.99582	6.37004	5.65017	5.6543	5.38275	6.19423	5.87652	6.07389	5.91523	6.68652	6.0558	6.0877	5.92062	5.22914	5.87087	6.16474
hsa-miR-339-5p	4.28074	1.80784	4.04035	3.46117	5.07602	6.24195	4.90891	4.54573	3.96463	4.07925	4.61099	4.67732	4.47074	4.81235	5.156	3.05451	4.76748	5.1188	5.42753	3.4758	3.36783	3.43171	4.34737	5.11544	5.04066	4.59362	4.63226	4.66756	4.09439	0	4.18214	4.94758	5.57647	4.89895	4.06626	3.37007	5.13972	2.92332	4.59053	3.99138	2.21591	1.5933	5.68652	4.83716	3.97223	4.11326	3.93963	4.71887	3.48024
hsa-miR-340-3p	6.21362	5.26728	6.40773	6.68356	6.10249	5.00163	6.22302	6.23761	6.85993	6.24399	5.24175	6.03989	5.58622	6.16168	5.4135	5.59057	6.79605	6.69707	5.82239	4.21276	5.55546	5.01667	5.43852	6.23091	5.97926	6.09951	5.84085	6.26513	5.84285	5.2605	6.01864	6.90338	6.04213	6.31399	5.7667	5.57766	4.6543	6.01078	6.39384	6.51622	3.80087	6.05273	6.39702	6.28462	3.97223	5.83573	4.47015	5.7584	6.71728
hsa-miR-340-5p	11.5998	11.0026	11.433	11.7497	11.4613	10.9829	11.0101	11.6526	11.4759	11.1222	11.4167	11.061	11.1025	11.3682	11.226	10.9329	10.9742	11.7837	10.8218	10.3503	11.6665	10.4013	10.9557	11.3577	11.5991	11.2329	11.1711	11.2659	10.7898	11.822	10.8606	11.4891	11.1757	11.0391	11.3435	11.6351	10.7502	11.1497	11.6101	11.242	10.9233	10.1169	11.628	11.4303	10.4587	10.7715	10.4208	10.8579	11.0663
hsa-miR-342-3p	8.35074	7.69049	9.10903	8.57665	8.48604	9.32356	8.45768	8.98484	9.86381	8.71751	9.04481	7.95743	7.64066	7.94671	9.26765	6.8094	9.12221	9.57184	8.62198	8.42999	8.33746	9.24763	9.44769	9.17891	7.50009	7.72455	7.05927	7.32653	8.2482	8.34023	7.62271	8.54698	8.46027	8.59631	8.44997	8.32869	7.34359	8.96771	8.83249	9.57143	9.02326	8.52404	8.14197	7.68151	6.74482	7.63683	8.17059	8.38815	8.47378
hsa-miR-342-5p	5.49373	7.33141	5.46259	6.12413	7.46069	7.46106	5.98486	7.03512	7.06897	6.06757	5.96057	6.55647	4.47074	7.06132	6.8268	6.01799	6.81711	5.99327	6.86247	7.21276	5.65734	7.72939	6.46766	4.54678	6.43297	6.79526	6.37881	6.01955	6.73594	5.50151	5.37478	5.29905	7.45094	6.22088	6.04354	7.63953	6.16526	7.13277	5.65957	6.59099	6.50131	7.45128	4.44948	6.37773	7.70919	7.25077	7.38442	6.7584	6.22747
hsa-miR-345-5p	5.75204	4.6152	5.01121	5.57665	4.64306	6.64549	5.25404	6.84529	6.4293	5.25434	6.62257	5.99925	6.83997	5.48051	5.05291	5.79867	5.23215	4.53384	5.14296	6.53469	6.2423	6.4906	6.57869	5.35644	6.18361	6.01586	5.46233	6.17453	6.34535	6.12299	7.01864	5.70431	5.50608	5.7514	5.58982	5.1872	6.21501	6.56718	6.18489	5.88447	7.46384	8.20801	5.34257	5.65572	6.70919	6.51926	5.97916	5.43159	6.40081
hsa-miR-3605-3p	5.24757	6.26728	5.27914	5.46117	6.38722	5.12265	5.76555	4.43025	5.73016	5.31488	6.21138	5.67732	5.58622	5.68862	6.11394	5.90251	5.9816	5.47244	5.26759	5.79773	5.19791	6.70473	5.91127	5.31897	5.88196	7.06871	6.34008	5.9588	6.05045	6.65905	6.23276	5.53254	5.70771	4.58701	5.49253	5.93195	6.33237	4.73068	4.67299	5.46414	5.21591	6.40065	4.64213	5.44812	5.8467	5.92062	5.8141	5.95834	6.42777
hsa-miR-3605-5p	3.52175	4.6152	4.09694	4.46117	4.8447	3.7241	2.86938	4.01522	4.27497	3.76891	4.04911	3.77686	2.88578	5.03192	4.73542	4.31755	4.21108	4.1968	5.05347	6.06076	4.72147	6.01667	4.82381	2.65601	5.09955	4.85666	3.94776	4.17453	5.17846	0	1.37478	3.84448	5.57647	4.48392	2.87362	4.10703	5.08726	3.50828	4.16603	3.90023	4.38583	4.5933	4.44948	4.86316	5.0877	2.79134	5.7239	4.24938	5.62708
hsa-miR-361-3p	5.49373	4.97777	5.37378	5.68356	5.36553	7.03726	6.02138	5.88969	6.48064	5.55132	5.38471	5.8007	5.88578	6.12237	6.12245	6.3325	6.03051	5.85577	5.92689	6.21276	5.32719	6.54719	5.3784	5.67096	5.66515	5.47333	6.08292	6.53858	6.28343	0	5.07522	6.05538	5.82801	5.70631	5.15372	5.26315	6.19035	4.50828	5.81292	5.93126	5.02326	5.29374	5.34257	6.17475	6.8467	6.25077	6.16203	5.57131	6.45424
hsa-miR-361-5p	7.91142	6.33141	8.49189	7.85349	7.38722	7.60154	7.88928	7.61348	8.39491	7.81505	8.03183	7.65787	7.31204	7.47427	7.61995	7.14198	7.4274	8.05216	7.35681	7.72373	7.28537	7.13215	8.04298	7.93368	6.99485	6.63627	6.90859	7.46403	7.05045	7.22733	8.25742	8.12302	7.48793	7.51039	7.51747	6.5476	7.00479	7.83021	7.28005	8.09435	7.91635	6.50019	7.64213	6.93232	6.24525	6.5727	7.05511	6.95834	7.41435
hsa-miR-3615	7.23493	7.2997	6.35069	6.68356	7.00763	8.20522	6.35767	6.75218	6.5687	7.25948	7.04911	7.03989	6.97324	7.20749	7.26765	6.84111	7.5245	6.9878	7.41186	6.79773	7.264	6.4906	6.99373	7.33079	7.52178	7.34208	7.43503	7.59955	7.17846	6.84546	6.69671	7.41603	6.76911	6.4705	7.16429	7.4082	6.75863	7.13277	6.71252	6.61508	7.70776	7.84123	7.48762	6.69966	7.57709	7.03926	6.99853	6.82507	7.18068
hsa-miR-363-3p	11.0528	9.37009	8.7931	9.56969	8.45556	8.83452	9.49712	9.65586	9.75227	9.64174	9.882	9.24283	9.87446	9.19806	8.03949	9.54637	8.43196	9.10622	10.7899	11.6804	10.2613	12.2699	12.2411	9.01502	8.7411	9.25355	8.29522	9.50577	9.8234	9.65905	10.9332	9.76114	9.26097	10.6063	9.75975	8.89213	10.2837	10.4547	9.96591	10.8407	11.6764	11.8624	9.09334	8.59302	10.6865	9.97869	10.8479	9.70629	10.3611
hsa-miR-369-3p	4.97105	4.39281	7.35069	5.46117	6.36553	4.29441	6.20725	4.65265	6.32077	5.69491	5.11622	4.26228	4.2077	4.98008	4.20491	4.59057	5.16801	5.39182	4.46272	3.4758	3.51984	4.43171	5.46766	5.11544	1.45569	4.90396	3.31033	1.74157	5.06525	0	5.18214	4.58145	3.9915	6.10407	4.58982	5.45348	0	5.50828	5.84884	5.02053	3.53784	3.5933	3.22709	5.22573	0	3.11326	2.35467	5.13391	3.25785
hsa-miR-369-5p	5.47952	4.39281	7.21028	5.04613	6.69617	5.46106	5.19131	5.30472	6.23964	5.2748	4.90472	5.99925	2.88578	5.13032	4.64379	5.3473	6.1789	5.1968	5.40961	5.4758	4.59023	5.43171	4.57869	3.8784	4.04066	4.47333	5.6482	4.41964	6.30852	0	4.69671	4.58145	4.64358	6.71772	5.62085	6.21615	4.5803	4.73068	5.90679	4.97659	4.91635	5.05273	3.96406	5.95062	4.19462	4.79134	5.16202	6.07251	4.13232
hsa-miR-370-3p	2.82131	1.80784	5.85593	3.87621	5.60654	4.86953	5.28442	4.54573	5.6427	3.37298	2.82671	5.22752	0	5.76208	3.61995	4.1249	5.37155	4.53384	5.29713	3.4758	3.65734	2.84675	3.28324	3.49731	1.45569	0	4.63226	3.0046	5.49493	6.32463	4.37478	2.79004	4.35407	5.53639	4.38819	5.40401	3.91733	3.92332	5.6046	4.15803	3.80087	4.5933	2.22709	4.64077	0	4.69823	3.35467	5.07251	3.48024
hsa-miR-374a-3p	8.16782	7.26728	7.99641	8.10502	8.71345	7.53457	7.97092	7.72793	8.02813	8.01075	7.65679	7.41686	7.64066	7.72056	7.84491	7.24829	7.34762	8.42055	7.23489	6.89084	7.71361	6.75364	6.60517	8.01502	7.9233	7.57912	8.3907	7.60451	6.75432	7.80107	6.58423	8.30392	8.28218	7.4705	8.04926	8.38502	7.55154	7.67821	8.38367	8.10289	6.57346	5.68076	8.32863	7.67419	6.91083	7.5727	6.76971	7.38183	7.7497
hsa-miR-374a-5p	8.29907	7.93713	8.13121	7.65757	8.222	7.15948	7.74931	7.41515	8.42406	8.08506	7.6736	7.35378	7.27809	7.64489	6.94188	7.69259	7.17347	6.77543	7.36381	7.9783	7.79782	8.15053	8.17695	7.51191	7.53251	7.37603	7.57086	7.02697	7.47844	6.04899	8.22027	8.33277	8.11489	8.26431	7.37004	7.18232	8.01185	7.13277	7.05765	7.99872	7.57346	7.11686	7.52477	7.4946	8.20744	6.76862	7.30887	7.1188	7.48024
hsa-miR-374b-3p	3.28074	0	4.20385	1.87621	3.49106	2.92763	3.02138	3.16722	4.6427	3.71002	4.86624	3.45493	0	1.62253	3.03498	4.05451	2.93098	3.40831	3.51395	2.89084	2.51984	0	1.40877	4.35644	4.84801	0	4.0946	3.12008	0.450536	0	4.18214	4.04379	2.76911	2.89895	3.06626	3.22568	0.332368	2.92332	3.9625	4.81962	0	0	3.96406	4.0558	0	0.791336	4.47015	4.54894	0
hsa-miR-375	9.07161	9.4003	6.97393	7.75885	8.21595	5.71313	7.15067	9.00516	7.50068	8.56385	9.90472	8.20982	9.83414	8.62675	5.34241	8.65443	7.9438	6.63538	4.80193	10.9434	8.03711	9.94478	11.1384	6.43299	9.04066	7.96099	8.52195	10.0716	8.55382	8.22733	8.01864	7.58944	8.85657	8.66272	6.80773	8.78993	9.80201	7.9006	10.1385	7.9877	9.21026	11.762	7.98198	8.2481	10.6137	8.99101	11.4701	8.2249	9.76035
hsa-miR-376c-3p	3.7755	3.39281	6.6819	4.87621	5.12849	3.6797	4.55744	4.30472	4.93548	5.10233	5.56368	4.57041	0	3.37741	3.03498	3.19202	3.70858	3.85577	3.94566	3.4758	3.19791	2.84675	0	3.07104	1.45569	0	2.14041	0	3.538	0	4.18214	2.54903	4.35407	6.54921	3.23619	4.3353	4.6543	3.50828	4.64602	4.37667	3.53784	0	0	4.0558	0	1.79134	1.76971	2.71887	4.13232
hsa-miR-378a-3p	9.16227	9.4589	8.19416	9.11461	8.77235	9.72887	8.16706	9.52477	8.53752	8.49356	9.3796	8.25798	9.42493	8.28964	8.24444	8.63345	8.23214	8.56175	8.41074	9.4758	8.84896	9.66053	9.98115	8.66443	8.40406	8.80464	8.94454	9.60823	8.98969	10.0772	10.0993	8.78482	8.82077	9.00283	8.52979	10.0221	8.97622	9.63068	8.74306	8.57757	9.89186	10.2622	8.89952	8.51113	9.6956	9.833	9.31274	8.25285	8.75503
hsa-miR-379-3p	4.03076	4.12977	5.99641	4.19813	4.32113	3.80899	4.90891	3.16722	4.74704	4.29498	3.11622	1.45493	1.88578	3.48051	0.713057	3.05451	3.93098	3.1968	3.97032	0	3.36783	4.43171	1.40877	2.53047	3.04066	0	0.140406	1.41964	3.84285	0	2.95974	3.33752	1.18415	5.85831	4.31419	4.14767	4.03281	0	4.56196	4.23465	1.21591	3.5933	3.22709	3.30373	3.70919	3.11326	4.09164	4.24938	2.25785
hsa-miR-381-3p	6.14323	5.97777	8.20063	7.36806	7.85252	6.12265	7.42738	7.33714	7.15998	7.08506	6.94219	6.20982	6.34521	7.45858	6.00768	6.73259	7.28349	7.5525	7.21697	6.13876	6.19791	4.84675	5.84617	5.82593	5.97926	5.99416	6.72537	5.70504	7.23844	6.93035	5.7671	5.97224	6.22854	7.91391	7.27572	8.29063	6.85593	5.50828	8.08049	6.66208	6.07389	4.76322	4.54902	7.20046	4.38726	6.74553	6.12726	7.53194	5.31674
hsa-miR-382-5p	2.82131	3.80784	5.90429	1.87621	6.25187	5.85961	2.28442	3.43025	4.27497	5.33451	0	3.57041	0	5.87991	4.75745	4.1249	6.16801	4.56359	4.68759	3.89084	1.19791	3.84675	3.28324	4.11544	0	2.53473	4.0946	0.419637	3.62046	0	1.37478	2.41153	4.18415	3.89895	4.23619	6.40401	2.33237	3.92332	2.82499	2.6986	0	0	2.64213	5.67051	4.38726	0.791336	0	3.45583	0.672885
hsa-miR-3928-3p	3.28074	5.12977	2.56642	5.04613	4.8447	4.40762	2.02138	3.43025	3.84434	2.93241	4.51477	3.95743	3.88578	3.83198	4.17249	3.73259	3.37155	2.1188	4.56342	4.21276	4.19791	0	3.7307	2.65601	4.36259	4.53473	3.46233	3.32653	4.20542	0	1.37478	3.0896	3.50608	3.42947	3.65122	4.3353	3.91733	2.92332	3.31042	3.58613	2.80087	0	3.81205	3.37773	1.38726	3.3763	3.35467	3.13391	3.25785
hsa-miR-409-3p	9.77186	10.7794	12.0854	11.354	12.3169	11.1865	11.001	10.6118	11.3801	11.137	11.1877	11.0867	9.00472	11.5052	10.1863	10.9445	11.3736	10.7441	10.9017	9.53469	9.89314	10.9316	9.92052	9.33196	10.063	10.1653	10.9964	9.88214	11.6524	10.7377	9.46754	9.43722	10.5914	11.6178	10.8952	12.382	11.0423	10.3327	11.3709	10.6759	9.91287	9.49417	8.6645	11.5484	9.0877	10.5379	10.6215	10.9914	10.1866
hsa-miR-409-5p	2.90877	5.50828	6.59617	4.46117	6.42966	3.6339	5.25404	3.16722	4.9932	4.82549	3.11622	3.77686	1.88578	6.07374	3.57104	1.31755	4.90498	4.53384	5.14296	0	2.19791	3.84675	3.91127	4.24097	3.62562	4.1977	2.84085	3.12008	4.73594	5.2605	5.37478	3.84448	6.22854	5.70631	4.97315	5.24453	4.23926	3.50828	3.31042	3.76899	0	0	0.642128	4.8887	3.97223	0	0.769708	2.71887	3.67288
hsa-miR-410-3p	9.2104	9.67203	11.2925	10.69	10.722	9.63898	10.3406	9.54226	10.5699	10.1701	10.3114	9.6464	7.9943	10.4613	9.29896	9.51395	10.3276	9.94111	9.86658	8.23069	9.04966	10.0415	9.40124	8.81504	8.57464	8.78266	9.85121	8.33253	10.3776	8.98098	9.03299	8.72803	9.41297	10.7562	10.2135	10.6603	9.76908	9.26317	10.5905	9.91632	8.99069	8.38772	8.27875	10.4815	8.60643	9.09054	9.52459	9.70376	9.15267
hsa-miR-411-3p	4.24757	1.80784	6.11074	1.87621	5.60654	3.43459	4.82874	4.54573	5.69581	4.76891	3.56368	3.57041	2.88578	4.48051	3.71306	3.05451	5.00626	3.85577	3.99457	2.89084	0.197908	1.84675	0	3.7149	0	2.75712	3.89529	2.74157	3.62046	0	2.95974	2.25952	4.35407	5.65977	2.06626	4.59246	4.33237	4.50828	4.69946	4.23465	4.02326	1.5933	1.64213	4.30373	0	2.3763	0	4.67823	2.25785
hsa-miR-411-5p	9.45884	9.55604	11.6406	10.4499	11.4342	10.4063	10.9046	9.61678	10.837	10.4582	10.1754	10.8191	8.57228	11.4413	10.1534	10.2996	11.6302	10.4871	10.7918	8.92426	8.77911	9.72326	8.54832	9.5315	8.75032	9.13712	10.451	9.10088	11.6419	9.78406	9.29959	9.43389	10.0265	11.2358	10.0549	11.1694	10.5755	9.55268	10.8496	10.2922	9.41066	8.72258	8.11786	11.4142	9.15545	9.98363	10.1685	11.2858	9.9606
hsa-miR-421	8.73719	8.48027	8.47598	8.35194	8.07602	8.54698	8.56982	8.22033	8.52534	8.39184	8.48968	8.12735	8.5582	8.31775	9.15496	8.52049	8.62347	8.34334	8.38345	8.56326	8.68575	8.61493	8.7095	8.42198	8.18361	7.97767	8.56037	8.49378	8.42208	7.84546	8.6694	8.7883	7.75401	8.65681	8.09417	8.54761	8.77116	8.39906	8.5511	8.73971	8.54682	8.8787	8.6645	8.38223	9.29415	8.25894	7.87823	8.3105	8.35939
hsa-miR-423-3p	11.2917	11.5694	11.8051	11.362	11.1596	11.6259	11.2924	11.6135	11.6151	10.7421	11.4573	11.3623	11.5206	11.3517	11.432	11.5144	11.3205	11.8593	11.7177	10.4377	11.6573	9.72939	10.6527	11.4223	11.382	11.3112	11.8071	11.2577	11.2799	10.5324	10.8383	11.764	11.6177	11.0139	11.3643	11.3808	10.85	11.5139	11.6026	11.3947	11.0377	10.4135	11.7316	11.6933	11.1455	11.4125	11.1695	11.6059	11.1323
hsa-miR-424-3p	6.26425	5.50828	4.09694	6.39977	4.22802	5.20327	5.37188	6.33714	5.73016	4.85297	6.2715	5.59789	7.2077	6.11438	5.03498	6.99937	5.8918	3.99327	7.17514	8.99936	7.01809	8.11353	8.43114	6.46765	6.23705	7.08932	5.14041	6.01955	6.42782	6.88853	7.91394	6.18763	5.9915	5.40146	6.06626	5.16757	7.57077	6.73067	5.98419	6.37103	8.41558	8.16316	5.68652	6.28462	7.29415	7.34593	6.8141	6.41931	7.50577
hsa-miR-425-3p	5.70395	2.80784	5.71843	4.68356	3.64306	4.98348	5.60635	4.30472	5.74704	5.33451	5.88561	4.91436	6.2077	4.73105	4.32777	5.01799	5.05436	5.56359	4.80193	5.06076	4.65734	5.01667	5.18136	5.98991	3.91513	4.34208	3.89529	4.54892	5.2319	6.60842	5.28167	5.64419	3.9915	5.15529	3.7667	4.26315	1.33237	4.50828	5.75099	5.13156	5.46384	4.76322	4.81205	5.18509	4.8467	4.49178	5.57706	5.16365	4.99481
hsa-miR-425-5p	10.7936	9.4589	10.0395	9.99515	9.38453	9.88855	10.4518	10.0474	10.5302	10.242	10.1224	10.1623	9.98906	10.1524	9.80185	10.0967	9.98703	9.82923	10.1443	10.9076	10.54	11.2021	11.3242	10.3938	9.57204	9.52341	9.87596	9.96653	10.2012	9.40098	10.6831	10.5132	9.81351	10.4103	9.84105	8.96785	10.0483	10.3369	10.4808	10.4937	10.8989	11.1031	9.95501	9.99244	10.582	9.89986	10.3166	10.0094	10.2802
hsa-miR-4286	3.21362	4.39281	4.20385	3.46117	4.49106	6.82436	3.60635	3.84529	4.71309	2.12505	3.46414	4.45493	3.88578	1.62253	4.82158	4.1249	4.61547	3.53384	4.76011	3.89084	4.1048	0	3.28324	4.62563	3.91513	3.85666	2.84085	2.74157	2.62046	0	3.69671	3.41153	3.18415	3.31399	2.06626	2.56271	0.332368	0	0.918103	2.18403	0	2.5933	2.22709	3.57937	0	3.79134	3.93963	2.71887	0.672885
hsa-miR-431-5p	6.19635	6.6152	8.42716	7.26852	7.42966	6.97432	7.86436	6.30472	7.9574	7.35867	6.06618	7.06964	5.2077	7.94896	6.76291	6.527	7.79251	6.78177	7.26011	4.89084	5.72147	5.84675	5.84617	6.10447	4.91513	5.1977	7.30028	5.72342	8.02039	5.97099	6.18214	5.80384	6.18415	8.22489	6.92424	7.7851	7.04661	4.73068	7.8038	7.3682	4.91635	5.29374	5.64213	7.85994	4.97223	6.14889	6.6766	7.60964	6.28759
hsa-miR-432-5p	6.95573	8.28358	9.63848	9.12413	10.3098	9.48947	8.64197	7.92211	9.02468	8.68347	8.15663	8.74033	6.47074	9.37156	8.36948	8.45369	9.9374	8.1213	9.11351	6.79773	7.00526	7.2043	5.10921	7.72389	7.50009	8.03192	9.01077	7.20754	9.45756	6.04899	7.71463	6.7761	8.48793	8.71771	8.27572	9.88012	8.4304	7.41517	8.33173	7.62934	7.02326	7.23716	6.06839	9.83798	5.47473	8.23428	8.41356	8.5906	7.09915
hsa-miR-433-3p	3.28074	1.80784	5.44089	1.87621	5.60654	5.21886	4.74385	2.43025	5.12813	4.64862	4.51477	3.57041	1.88578	4.35045	2.88298	4.19202	4.79605	3.2708	3.40961	2.89084	3.00526	3.43171	3.52425	3.5629	3.62562	2.2717	3.84085	2.58956	4.80809	4.38603	2.95974	2.54903	2.76911	5.42947	3.23619	4.6216	2.33237	4.50828	4.12756	3.80294	4.91635	0	2.96406	4.37773	0	1.79134	4.47015	3.71887	1.67288
hsa-miR-4435	4.28074	6.50828	5.27914	4.68356	4.02157	5.40762	5.3999	5.84529	4.53023	5.25434	5.24175	6.29623	6.27809	5.48051	6.01684	5.09014	5.91804	4.70376	5.15377	5.06076	5.05589	5.01667	4.28324	5.72209	4.62562	5.07905	6.02305	3.9432	5.57982	0	3.95974	5.15569	5.18415	4.18846	5.62085	5.63596	5.85593	6.01078	5.22188	4.90023	4.38583	4.76322	5.59633	5.92617	3.70919	5.18365	4.35467	4.94126	5.19645
hsa-miR-4446-3p	7.81566	9.99272	8.30939	8.39977	9.94319	9.2524	8.12991	8.42272	8.67171	8.37772	7.86624	9.67732	9.02533	10.1244	10.2767	10.1388	9.79251	9.89066	9.07991	7.50555	8.93262	8.32248	7.95823	8.07947	10.5471	9.13959	9.82428	9.35037	9.11942	9.01052	7.07522	7.79004	9.754	8.05096	8.77017	10.3609	9.19965	8.11314	8.67132	8.49561	7.65885	7.96834	9.13398	10.2858	9.37026	9.46022	8.44919	9.15442	8.47378
hsa-miR-450b-5p	4.14323	4.39281	3.20385	1.87621	3.12849	4.38014	4.90891	4.54573	4.90574	4.12505	5.48968	1.86997	4.2077	3.48051	3.10537	3.43303	3.21108	3.53384	3.73154	5.4758	4.00526	5.16867	5.97355	5.7149	4.97926	4.53473	3.66397	4.5071	3.84285	0	7.20767	5.23934	4.18415	3.97696	4.58982	3.29968	4.50229	5.38275	4.00556	4.91583	5.85976	4.40066	3.96406	3.64077	3.38726	4.96126	3.57706	3.45583	4.92081
hsa-miR-451a	15.01	12.8358	11.5322	12.5264	12.6431	11.5207	12.7251	13.7681	13.1163	12.8456	13.5959	12.7444	13.2312	12.6762	10.8973	13.5399	12.1376	12.2953	14.0368	15.3682	14.6182	16.3012	16.0573	11.9972	12.8288	12.9536	10.4974	12.8921	14.1721	13.2062	14.8078	12.8576	13.26	14.3395	13.4764	12.6541	13.8878	14.7161	13.4006	14.3189	15.7617	15.7803	11.9019	11.9354	14.6192	14.249	14.8818	12.7751	14.0592
hsa-miR-452-5p	4.03076	0	4.09694	0	3.9061	3.92763	3.15889	4.54573	2.90574	4.95794	3.82671	1.45493	4.47074	3.08196	1.71306	2.05451	3.21108	3.34119	2.99457	0	2.51984	0	0	3.15851	3.26305	4.99416	3.0473	3.0046	4.57982	0	1.37478	4.51586	0	4.18846	0	2.67819	4.03281	5.62376	2.82499	3.76899	0	0	5.68652	2.51524	0	2.79134	3.57706	3.13391	4.25785
hsa-miR-454-3p	6.25593	4.12977	6.67262	6.26852	5.81299	6.63971	6.03931	5.23761	6.26329	6.41046	6.19595	5.77686	2.88578	6.18477	6.52684	5.68678	6.18971	6.00416	5.30685	5.89084	5.65734	6.23906	6.16366	7.04546	5.40989	5.73113	6.0946	6.06349	5.94239	6.44492	6.18214	6.53254	6.18415	6.35839	4.7667	5.79793	5.94708	5.38275	5.36105	6.54158	6.1228	5.76322	5.64213	5.91378	5.70919	5.25077	5.01764	5.97521	5.76035
hsa-miR-454-5p	6.50079	4.6152	6.92006	6.73419	6.29841	6.1875	6.53235	6.60018	6.91323	6.65644	6.21138	7.17375	6.2077	6.28074	6.44777	6.6751	6.71608	6.42461	6.53889	6.21276	6.7525	7.27301	6.25007	6.51813	6.88196	6.53473	6.88187	7.201	6.48396	6.50151	6.41918	6.79696	6.46955	6.49721	6.52569	6.19692	6.08726	5.73068	6.95153	7.02772	6.2603	5.50019	6.83195	6.5636	6.19462	4.25077	5.5246	6.44376	6.92081
hsa-miR-4662a-5p	5.96086	5.97777	5.62532	5.04613	4.96499	4.86953	5.88928	4.93275	5.74704	6.25434	5.56368	5.84725	3.47074	5.55326	5.4135	5.51394	5.03051	5.44073	4.40961	4.69819	6.1521	5.16867	5.52425	5.6102	5.50009	4.2717	4.42581	5.35037	5.45054	0	5.28167	5.93509	6.09104	5.01443	5.42381	4.50131	5.13972	5.24525	5.27565	5.37667	6.02326	3.91523	5.59633	5.07817	3.97223	4.11326	3.09164	3.87087	4.67288
hsa-miR-4677-3p	4.46516	5.26728	3.30339	5.04613	5.17912	4.46106	4.50681	5.01522	4.36517	4.67964	4.86624	3.77686	5.88578	5.08196	4.61995	4.90251	4.73833	5.63538	5.01842	5.4758	4.84176	6.16867	4.21612	4.83923	4.70362	4.70465	5.07114	4.32653	4.90997	5.2605	5.28167	4.44715	4.76911	3.81649	5.11066	5.24453	4.03281	3.92332	5.02663	4.20956	5.46384	4.17826	5.64213	4.61039	4.70919	5.11326	3.35467	5.07251	5.25785
hsa-miR-4732-3p	7.5594	6.56273	4.75405	6.12413	6.76408	6.27216	5.69946	6.70327	5.92069	6.16945	6.91418	6.97849	6.58622	6.28786	4.54595	7.41207	6.20044	5.99327	7.67264	9.57734	7.46469	10.0366	8.9608	4.68575	6.97926	7.62219	5.34986	7.24619	7.50038	7.99089	7.81772	5.67456	7.04213	7.9482	7.13235	7.53617	8.17786	7.62376	6.95702	7.02413	9.1228	9.52404	6.13398	5.9627	8.91083	8.2176	8.28541	6.13391	8.21978
hsa-miR-483-5p	4.70395	5.71473	3.78882	1.87621	3.9061	0	0	1.84529	2.12813	3.82549	3.46414	3.19189	5.69313	4.92631	2.4135	4.90251	3.70858	2.53384	3.29713	0	3.78287	4.6541	3.7307	0.071043	2.45569	3.53473	3.38833	5.27762	4.62046	0	3.69671	1.41152	4.35407	0	1.06626	6.50913	4.33237	2.92332	2.08803	4.15803	4.02326	2.5933	2.22709	3.37773	4.38726	3.3763	3.93963	3.79687	0
hsa-miR-484	10.035	9.21724	10.0874	9.32742	8.61115	10.7227	9.3999	9.09322	9.66729	8.36346	9.51166	9.27511	9.38562	9.10533	9.52604	9.38004	9.61046	9.91682	9.79547	9.71738	9.74094	9.59494	10.3385	10.0125	8.86932	8.69796	9.21321	9.44616	9.43496	8.38603	10.033	9.96611	9.38872	9.82311	9.38819	8.65194	9.12678	9.25424	9.51522	9.44612	9.90939	9.51811	9.4202	9.3296	8.65405	9.044	9.06433	9.0468	9.18858
hsa-miR-485-3p	4.75204	5.39281	6.57641	3.87621	6.3435	5.78823	5.67674	3.65265	5.89063	5.50009	4.46414	5.26228	4.2077	5.25188	5.37127	5.25615	5.39041	5.01497	4.17514	4.89084	1.78287	4.84675	3.7307	4.67096	4.15613	1.94977	3.31033	1.74157	5.49493	0	3.95974	3.25952	5.09104	6.10407	4.58982	5.7851	3.50229	0	4.64602	4.80294	2.21591	2.5933	0	5.18509	0	3.3763	3.09164	5.07251	2.67288
hsa-miR-485-5p	4.03076	6.33141	7.1974	5.87621	6.64306	5.21886	5.5821	5.09322	5.4293	5.63285	4.61099	5.42455	4.69313	6.52339	4.82158	6.46051	7.01236	5.37514	6.00655	1.89084	4.44583	6.93421	4.40877	4.09341	4.45569	4.80775	5.24893	4.27762	6.78145	6.32463	5.07522	4.21888	5.70771	6.49721	5.68097	6.89064	5.54182	5.62376	5.9181	5.17109	4.53784	3.5933	2.64213	6.52341	4.38726	5.92062	5.41356	6.1188	4.57978
hsa-miR-486-3p	5.12509	5.12977	3.3965	1.87621	2.9061	2.6797	3.02138	3.43025	3.02121	3.12505	3.82671	1.45493	5.0557	3.57672	2.4135	3.63948	3.29355	3.2708	3.48	1.89084	4.28537	5.30618	5.75454	2.31897	7.7411	4.1977	4.14041	3.12008	3.35743	5.123	4.95974	3.84448	4.18415	5.12135	3.97315	3.93194	4.6543	4.24525	2.82499	4.8361	5.02326	5.05273	4.44948	2.37773	5.29415	2.79134	0	3.24938	2.67288
hsa-miR-486-5p	18.3522	17.4477	16.2147	17.8329	17.5406	17.6761	16.9583	18.0798	16.6359	16.9742	18.0241	18.1171	18.097	17.6442	17.1949	17.9164	17.6796	17.9091	18.8492	19.8394	18.4694	20.4684	19.1728	16.2457	17.0262	17.9795	16.8353	17.4032	18.0758	19.9307	18.1846	16.9002	17.6342	18.3885	18.5255	18.7016	18.8946	18.3868	17.9662	17.8429	19.8774	19.9938	17.6092	17.1083	19.3558	18.8279	19.0934	17.5987	18.7824
hsa-miR-487a-3p	4.28074	3.39281	5.41887	2.87621	4.12849	2.6797	5.09177	1.84529	5.25151	4.98304	4.11622	3.45493	1.88578	3.57672	3.03498	3.73259	4.29355	3.34119	4.08768	2.89084	3.51984	4.16867	4.34737	3.20033	2.45569	0	3.22787	1.74157	3.0355	0	2.37478	2.54903	1.18415	5.31399	2.65122	4.3353	3.6543	0	4.34437	4.78606	2.80087	1.5933	0	3.86316	0	2.79134	2.76971	3.71887	4.25785
hsa-miR-487b-3p	5.7755	4.6152	7.95109	6.46117	6.12849	5.29441	6.46764	5.30472	6.97182	6.13628	5.18035	5.67732	4.47074	5.89865	5.31297	6.19202	6.78183	5.56359	5.66511	0	4.72147	5.01667	4.99373	5.11544	4.26305	3.85666	5.0946	4.62909	6.70792	0	4.95974	5.19812	4.18415	7.52993	5.42381	5.63596	3.6543	3.92332	6.49553	6.17109	5.30337	6.17826	2.96406	5.7423	0	4.3763	6.26156	6.39443	5.48024
hsa-miR-493-3p	3.8657	5.12977	5.87223	5.7831	5.71345	4.29441	5.88928	4.54573	6.14095	5.12505	5.58753	4.39353	1.88578	5.87045	3.80052	4.48747	5.82406	5.1968	5.74589	0	3.36783	1.84675	2.40877	4.31897	3.62562	3.2717	4.49796	4.37383	5.00512	5.2605	4.95974	4.21888	3.76911	6.15529	3.52569	5.06521	5.50229	4.73068	5.75099	5.29554	4.80087	4.17826	3.22709	5.24563	3.38726	5.25077	5.09164	6.13391	2.25785
hsa-miR-493-5p	5.45066	5.50828	7.52062	6.26852	8.57852	6.92763	6.66524	5.36885	6.19114	7.06169	4.65679	6.36182	3.47074	7.19238	6.13932	5.09014	7.17347	6.66312	6.69131	4.69819	4.9528	5.16867	1.82381	5.88482	4.36259	5.07905	6.54129	5.03435	6.78145	4.123	4.69671	4.84448	6.5417	6.52345	5.79418	8.41862	5.5803	4.50828	6.62546	5.80294	5.53784	4.5933	4.34257	7.10565	3.38726	4.96126	3.57706	6.7584	5.57978
hsa-miR-500a-3p	5.21362	4.97777	5.6819	6.12413	5.02157	6.50625	5.76555	5.84529	5.62455	5.99542	6.13252	5.42455	5.34521	5.72056	5.67884	4.19202	3.70858	6.40009	5.51395	4.69819	5.7525	5.30618	5.70645	6.05973	5.84801	6.17859	5.63226	5.66756	4.84285	5.88853	6.46224	5.41153	4.35407	5.40146	5.79418	5.02214	5.33237	6.24525	6.17549	5.6246	6.64217	5.29374	6.28598	5.44812	6.34146	5.96126	6.29327	5.69869	5.0652
hsa-miR-501-3p	6.50079	7.97777	7.13121	6.63109	7.39795	7.66839	6.85933	6.46	6.86767	7.27987	6.74425	6.40913	7.90814	7.35045	6.19687	5.61523	5.49866	6.82539	7.10727	6.59128	6.19791	7.2043	8.20751	7.39972	7.78661	7.83851	6.58335	5.72342	7.45054	8.55595	9.32315	6.95996	8.13835	6.76245	6.87362	6.75911	6.50229	6.38275	6.15651	7.35395	8.15842	6.68076	6.79188	7.23073	7.24525	5.43519	6.79208	6.24938	6.03044
hsa-miR-5010-5p	5.24757	7.50828	4.75405	5.68356	6.79687	4.86953	5.15889	5.36885	4.84434	5.14742	4.35723	6.65133	6.2077	6.87519	7.2867	7.50077	6.81012	4.64932	6.819	6.84503	5.51984	7.67964	5.07173	2.15851	6.70362	6.09951	6.59984	6.04899	5.84285	6.04899	4.69671	4.375	7.31343	5.08658	5.35166	7.23514	6.88696	5.83021	5.72546	5.11814	5.53784	7.80275	5.72959	6.99244	8.16862	6.98116	6.47015	6.91527	6.88234
hsa-miR-505-3p	4.17886	0	4.09694	3.46117	3.32113	4.70207	3.69946	4.54573	4.12813	4.25434	1.65679	4.67732	1.88578	3.20749	4.13932	3.19202	3.03051	4.07816	3.78812	1.89084	4.36783	2.84675	4.28324	4.74347	2.45569	3.94977	3.84085	3.41964	2.25789	0	5.46224	4.21888	4.64358	3.72903	4.15372	3.7851	2.6543	4.50828	2.37753	4.71652	4.02326	3.5933	3.44948	3.37773	0	3.3763	0	3.45583	1.67288
hsa-miR-5189-3p	1.40627	4.39281	3.92006	0	2.9061	4.29441	3.02138	3.65265	0.905736	0	4.18035	4.11789	3.47074	4.17711	0	0.732586	3.9816	5.1387	4.67264	0	2.51984	0	1.40877	3.46336	3.45569	4.80775	0	3.41964	1.45054	4.123	3.37478	1.41152	4.88459	3.05096	3.23619	2.7851	2.33237	2.92332	4.04739	1.6986	0	4.40066	3.22709	3.64077	0	1.79134	3.76971	3.63641	2.99481
hsa-miR-5189-5p	3.46516	5.97777	3.71843	0	3.49106	5.30906	3.69946	5.01522	3.4907	0.710017	4.35723	5.26228	3.88578	4.70999	0	3.73259	5.75298	5.90307	5.55529	2.89084	5.36783	3.84675	3.82381	4.37482	5.45569	4.59362	4.49796	4.17453	4.30852	0	5.18214	4.44715	6.04213	2.89895	3.97315	5.1872	4.23926	4.50828	4.82499	3.50596	2.80087	4.17826	3.64213	4.69966	0	2.79134	2.35467	5.10353	3.84281
hsa-miR-532-3p	3.40627	2.80784	0.396497	2.87621	3.64306	3.96511	3.15889	0	0.905736	3.37298	3.24175	2.67732	1.88578	2.42988	2.29802	4.25615	2.58305	3.53384	2.61124	5.21276	1.19791	5.16867	3.99373	3.7149	2.45569	3.85666	1.94776	3.58956	3.62046	0	4.95974	2.41153	3.76911	3.63592	3.38819	2.43718	0	0	2.37753	2.46414	4.02326	5.5933	1.64213	3.22573	0	3.59869	5.09164	3.45583	4.76035
hsa-miR-532-5p	8.64148	7.53576	6.15139	7.73419	7.39795	7.58057	7.17519	7.55954	7.32077	7.03794	7.56368	7.29623	7.93017	7.14609	6.6497	7.91746	6.68586	6.97124	8.1211	8.06076	8.34765	8.56099	9.17695	7.38393	7.93143	8.38856	7.07704	7.77278	7.95038	8.04899	9.46754	7.56533	7.65988	7.96744	8.01463	7.84503	8.38765	7.70468	7.90962	8.17596	9.22714	8.8317	7.41031	7.33657	9.33563	8.57924	8.3243	7.57131	7.45424
hsa-miR-539-3p	4.60267	4.12977	6.98895	4.46117	5.49106	4.13913	5.60635	3.84529	6.06224	5.60079	2.65679	4.51382	3.47074	4.59981	3.84234	4.53994	5.75298	4.78177	4.9825	3.89084	3.89835	0	3.91127	4.22079	3.04066	2.94977	3.89529	4.37383	5.33318	0	4.18214	4.0896	3.76911	6.15529	4.23619	4.93194	3.50229	4.50828	5.65957	5.06317	3.21591	4.91523	3.22709	5.07817	0	4.11326	2.76971	4.71887	4.67288
hsa-miR-542-3p	1.82131	1.80784	0.98146	4.46117	0.321134	3.07202	3.78692	2.43025	3.12813	2.44698	1.97872	0.869966	5.0557	3.75181	0.713057	4.43303	3.03051	0.948876	3.99457	4.69819	3.19791	4.43171	3.63116	3.95369	2.77762	3.65021	3.89529	2.87907	3.0355	0	3.37478	3.61316	1.18415	2.89895	1.65122	3.06521	5.28656	2.92332	3.24003	3.76899	4.80087	5.91523	3.64213	3.44812	5.19462	4.69823	0	3.94126	1.67288
hsa-miR-543	4.17886	4.80784	5.17786	4.68356	5.87572	4.03726	4.86938	4.30472	5.45006	4.98304	3.24175	5.8007	3.47074	4.50517	4.10537	5.40501	4.9816	3.59273	5.39146	5.21276	2.19791	5.01667	3.28324	2.8784	4.36259	5.30732	4.69499	3.5071	5.67935	0	3.69671	3.79004	5.57647	5.31399	4.97315	5.74593	4.72469	3.50828	4.80075	4.07711	2.21591	1.5933	1.64213	3.9627	1.38726	3.3763	3.35467	5.57131	4.57978
hsa-miR-548b-5p	3.21362	3.39281	3.48396	2.87621	1.9061	2.58659	0.699457	3.43025	0.320774	0.710017	1.24175	3.67732	4.2077	3.87045	3.35691	3.73259	2.44555	0.533839	3.13208	3.4758	3.65734	4.84675	3.7307	2.82593	3.62562	2.53473	3.14041	3.5071	3.15098	5.123	3.37478	2.89695	2.18415	2.53639	3.87362	1.7851	5.13972	4.24525	3.00557	3.86853	3.53784	4.40066	4.34257	3.75624	5.29415	3.3763	4.76971	3.3563	3.48024
hsa-miR-548e-3p	5.60267	5.80784	6.25448	6.33564	5.07602	5.46106	5.42738	5.79949	4.81263	5.568	5.11622	4.86997	6.0557	4.35045	4.84234	4.68678	5.21108	4.70376	5.21697	4.69819	5.81262	2.84675	5.6567	5.6635	6.04066	6.09951	5.11769	5.48573	3.35743	6.32463	5.69671	5.85778	6.57647	5.79512	5.79418	4.56271	5.85593	5.09325	5.57631	5.4101	5.30337	3.5933	5.39702	5.0558	4.55719	3.59869	5.89899	4.54894	4.84281
hsa-miR-548j-5p	2.7282	4.6152	2.71843	0	4.32113	2.92763	3.69946	3.43025	3.84434	3.51737	4.41168	3.95743	2.88578	3.26638	4.35691	3.90251	4.37155	3.53384	3.73154	0	3.19791	0	3.91127	5.39297	4.45569	1.94977	4.1848	3.32653	3.538	0	3.37478	4.375	3.18415	1.72903	3.38819	3.67819	2.33237	0	3.72546	2.76899	2.21591	3.91523	0.642128	3.69966	3.70919	1.79134	0	3.00838	3.25785
hsa-miR-548k	5.7282	5.71473	6.04035	6.46117	6.04906	6.13091	5.34331	4.84529	6.26329	5.76891	4.90472	6.05979	6.40934	5.69934	5.55855	5.48747	6.36203	5.0574	5.71704	4.89084	5.1048	4.16867	5.7307	5.49731	4.84801	6.15922	6.32031	5.60946	5.73594	5.80107	5.62271	6.30877	6.50608	5.93848	5.55811	4.90849	5.91733	5.38275	6.11777	6.13822	4.91635	5.40066	6.70822	5.71402	6.14215	5.79134	5.22914	6.07251	5.42777
hsa-miR-548o-3p	4.17886	4.39281	4.04035	4.19813	3.78057	3.6339	4.28442	3.84529	4.40824	3.93241	2.97872	1.45493	3.47074	2.52942	3.57104	2.05451	2.44555	4.1188	3.54711	3.89084	4.84176	3.43171	5.10921	4.65601	3.62562	2.2717	4.59984	4.37383	1.77246	0	4.37478	3.67456	3.76911	4.37289	4.23619	3.37007	3.6543	3.92332	4.12756	3.96164	5.1228	3.91523	2.22709	3.30373	3.97223	5.03926	3.09164	2.87087	3.99481
hsa-miR-556-5p	3.40627	0	4.25448	0	2.64306	3.07202	3.94738	1.84529	4.53023	3.44698	2.65679	3.67732	0	2.20749	4.49442	3.63948	4.16801	3.1968	3.48	0	4.1048	3.84675	1.82381	4.5946	2.45569	0	0	2.41964	3.45054	0	1.37478	3.94758	3.50608	3.42947	2.38819	2.88464	2.6543	2.92332	3.16603	4.39904	0	4.76322	3.81205	3.22573	0	3.3763	0	3.00838	3.48024
hsa-miR-574-3p	7.80999	7.0173	8.25759	6.8304	6.36553	6.98348	6.56982	7.18514	7.26914	7.2748	7.30065	7.42455	7.1337	6.52942	6.48784	7.3325	6.79605	6.84369	7.4186	6.59128	6.96609	7.09467	8.15024	7.7203	6.09955	6.93845	7.02915	7.55406	6.88516	0	8.1027	7.29905	6.46955	7.58078	7.06626	6.41238	5.19035	6.50828	6.89538	7.62223	7.80087	7.37466	7.24204	6.58719	5.91083	5.83573	6.09164	7.63109	6.40081
hsa-miR-574-5p	4.57619	6.39281	6.53605	4.46117	6.53059	6.65125	4.45434	4.16722	4.74704	6.30496	5.67916	7.69015	6.88578	7.60267	7.30925	7.73259	7.52023	6.44073	7.56139	6.06076	5.32719	5.30618	4.95309	5.65601	6.36259	7.5571	7.36441	5.77719	6.69846	6.2605	5.46224	4.70431	7.65988	4.89895	6.08863	7.36145	7.16526	4.24525	5.80075	4.73423	4.80087	5.84123	5.68652	8.16955	3.38726	6.14889	3.09164	7.34984	6.0652
hsa-miR-576-5p	5.47952	3.39281	4.60595	3.46117	2.64306	4.20327	5.09177	4.43025	4.12813	5.0077	4.41168	4.19189	4.88578	4.08196	4.54595	3.98051	2.58305	3.70376	4.53063	4.89084	5.28537	4.84675	5.68179	5.11544	4.91513	4.99416	2.94776	5.35037	3.84285	0	5.54471	4.21888	3.50608	4.89895	2.38819	3.97775	5.37676	3.92332	5.12756	5.7254	4.80087	4.76322	3.44948	4.0558	0	3.96126	4.35467	3.3563	4.13232
hsa-miR-584-5p	10.828	11.3701	11.0529	10.9584	11.9409	11.451	11.3008	10.7552	11.044	11.4113	10.9288	11.5932	11.2323	12.0096	11.4057	11.5777	10.935	11.4675	11.3427	11.0658	11.3546	10.7656	10.7597	11.6926	12.3675	11.3302	11.3975	11.3555	11.3351	10.8938	10.5964	11.1935	11.6528	10.558	10.8509	11.9984	10.8111	10.658	11.0493	10.9078	10.5013	10.8764	11.1118	12.1428	10.6376	11.1019	10.2147	11.327	11.2408
hsa-miR-589-5p	6.79859	7.36243	6.6349	7.7831	7.42966	6.63971	7.33608	7.55954	7.00025	6.39184	7.67916	7.13675	7.44036	7.09013	6.34241	6.90251	6.54989	7.14855	7.02137	7.53469	7.64085	7.46146	7.45316	6.5629	7.19716	7.79526	6.95419	7.39118	6.60028	7.29292	6.80105	6.93509	7.61041	6.7514	7.63612	7.26777	7.06029	7.62376	7.6046	7.06317	7.88833	7.40065	7.94591	6.88869	7.00197	7.50558	7.56412	7.43769	7.2728
hsa-miR-590-3p	5.76382	4.6152	5.93566	4.68356	4.02157	4.43459	5.78692	5.43025	6.23964	5.19114	4.90472	3.77686	5.47074	3.66692	5.0881	4.59057	4.67821	4.99327	4.80193	4.69819	5.32719	2.84675	6.05263	5.80575	4.62562	3.75712	5.11769	4.8459	4.57982	0	3.95974	5.87096	4.64358	5.12135	4.92424	3.97775	3.7918	5.24525	5.32749	5.90806	5.30337	5.76322	4.54902	4.0558	4.19462	4.3763	5.16202	4.71887	4.57978
hsa-miR-598-3p	4.43602	3.39281	4.3965	4.87621	4.64306	4.20327	4.28442	5.23761	4.60618	4.25434	3.74425	2.67732	3.88578	4.17711	4.32777	4.68678	3.70858	4.50347	4.04188	3.4758	4.65734	4.43171	4.21612	4.67096	4.91513	4.85666	4.0946	5.201	4.25789	0	5.18214	2.67456	3.50608	4.42947	4.06626	5.40401	3.13972	3.50828	4.24003	3.90023	1.21591	3.17826	5.39702	4.37773	4.19462	0	4.35467	5.13391	2.67288
hsa-miR-625-3p	6.00122	4.12977	6.55637	6.12413	5.8447	4.61044	5.8492	6.72793	6.06224	6.74711	8.33275	6.22752	6.83997	5.98885	7.49113	6.46051	5.82406	5.9601	5.80193	5.59128	7.35778	4.84675	4.95309	7.61214	5.62562	7.18817	6.59162	8.5071	5.33318	5.80107	6.07522	6.41153	5.57647	5.97696	6.89915	5.48554	4.33237	6.01078	5.90679	5.73423	7.282	4.40066	7.08507	6.67786	5.77958	5.83573	6.41356	6.50314	6.03044
hsa-miR-628-3p	7.64149	7.80784	7.98146	7.26852	7.03538	7.39395	7.39294	7.05474	7.53023	7.59673	6.74425	7.28782	7.40934	7.81974	8.09244	6.8094	7.95967	7.95169	7.02726	6.9783	6.91215	6.80094	7.29141	7.39747	6.94755	6.54968	6.82691	6.47492	6.83424	5.2605	7.6036	7.48191	7.89839	6.90894	6.80773	6.87257	6.23926	6.87752	7.16128	7.32796	6.07389	6.17826	7.16569	7.43518	5.0877	6.14889	6.6026	5.81573	5.67288
hsa-miR-628-5p	5.92983	5.39281	4.95109	5.33564	4.49106	5.38014	4.90891	4.75218	5.20342	4.55132	4.70118	4.82416	6.0557	4.52942	5.156	5.22444	4.29355	5.39182	4.8156	4.4758	5.68976	4.43171	4.7307	5.18998	5.21058	4.53473	5.93482	3.81196	4.45054	5.88853	5.37478	5.76202	5.50608	4.72903	4.71012	4.75911	5.28656	4.73068	5.27565	5.42107	4.38583	3.5933	5.64213	4.91379	0	0.791336	5.16202	4.94126	5.13232
hsa-miR-629-5p	3.06923	3.39281	2.20385	4.19813	3.64306	3.53768	2.02138	4.16722	4.07566	3.87994	3.35723	3.3294	5.58622	4.75181	1.71306	3.90251	4.44555	3.1188	5.78812	5.9783	4.51984	5.01667	2.40877	3.15851	4.04066	4.34208	3.99839	4.5071	5.00512	4.97099	4.54471	1.41152	4.64358	2.72903	4.45858	5.04384	3.91733	4.92332	3.31042	3.13156	5.97079	4.91523	4.10156	3.91379	4.55719	4.3763	4.22914	4.13391	5.13232
hsa-miR-641	4.21362	4.39281	4.30339	4.19813	3.9061	4.17156	3.69946	3.65265	4.78021	5.35387	3.82671	3.3294	2.88578	4.29495	4.49442	3.19202	5.35244	4.2708	4.11005	2.89084	4.00526	0	3.91127	4.5946	4.91513	2.53473	4.42581	3.66757	4.20542	5.2605	2.95974	5.87096	4.18415	3.63592	4.52569	3.37007	3.91733	4.50828	4.72546	4.18403	2.80087	0	4.22709	4.61039	4.55719	5.03926	2.76971	4.83435	4.25785
hsa-miR-6511a-3p	4.6542	4.6152	4.04035	4.87621	5.12849	3.48706	4.69946	4.93275	4.07566	4.29498	4.04911	3.95743	1.88578	4.04879	4.32777	5.48747	3.51594	3.99327	4.71704	0	4.65734	4.84675	5.18136	3.02524	4.84801	4.80775	4.86833	4.97423	4.84285	5.123	3.37478	4.51586	5.18415	3.89895	5.38819	3.67819	5.08726	3.92332	4.24003	4.91583	5.60823	5.5933	4.44948	4.26526	5.38726	4.49178	4.6766	4.54894	5.13232
hsa-miR-6511b-3p	2.90877	1.80784	3.09694	4.68356	4.02157	2.38014	4.34331	4.65265	4.6427	4.16945	4.51477	3.77686	5.34521	3.90793	4.44098	4.77698	4.12362	4.15833	2.54711	3.4758	3.19791	4.6541	4.14574	3.77148	4.91513	4.53473	4.42581	4.5071	4.80809	2.80107	2.95974	2.99649	3.18415	3.72903	4.87362	3.83573	4.7918	3.92332	2.50307	3.76899	4.02326	0	4.44948	3.69966	3.38726	0.791336	5.76971	4.07251	4.25785
hsa-miR-652-3p	7.71612	6.66583	6.98895	6.04613	5.56906	7.51259	6.71068	6.91138	7.02813	6.49138	6.96967	6.67732	6.27809	6.89399	6.87293	7.04547	6.73095	6.83152	6.73873	7.72373	7.54664	8.09467	8.10458	7.02815	6.0704	6.32481	6.10619	6.3385	7.27708	6.38603	7.88258	7.10082	6.18415	7.49058	5.97315	6.47759	6.70741	6.87752	6.27565	7.37103	7.75507	7.70182	6.19672	6.98654	7.16862	6.67398	8.07349	6.46781	6.78141
hsa-miR-654-3p	8.5594	7.56273	10.7899	8.93149	9.06597	8.13503	9.49874	7.67818	9.67171	9.09228	8.98322	8.38172	6.74376	8.53542	7.36051	7.74381	9.28223	8.75462	8.75568	7.3171	7.89835	7.80094	7.79535	7.88962	6.84801	7.56448	8.25415	7.42526	9.30072	7.7318	8.6036	8.22145	7.20652	10.0811	8.5859	8.42896	7.98342	8.07307	9.40393	8.87053	8.08627	7.42619	7.14992	8.20809	6.19462	7.74553	7.99853	9.23894	7.78141
hsa-miR-654-5p	3.21362	6.05577	5.50502	5.04613	7.11555	5.75652	5.60635	5.23761	5.02121	5.23358	5.61099	6.26228	1.88578	6.39731	4.96098	5.68678	5.81012	4.40831	6.30685	3.89084	3.65734	5.93421	2.99373	3.2805	4.70362	4.85666	6.34008	4.66756	6.93435	5.70796	3.69671	3.17706	4.64358	5.45695	4.97315	7.17742	5.23926	4.24525	5.45726	3.46414	5.30337	3.17826	2.22709	6.66313	4.19462	4.11326	5.41356	6.3303	4.67288
hsa-miR-660-5p	5.90877	5.26728	4.09694	5.04613	5.60654	4.96511	5.60635	5.75218	5.85993	5.61691	4.86624	5.26228	6.40934	5.63375	4.5957	4.63948	4.90498	5.40831	5.5715	7.13876	5.62417	7.40134	7.02348	6.08785	6.04066	7.14944	5.11769	5.9588	6.21872	1.80107	7.69671	5.7761	4.50608	5.70631	5.19555	5.42069	6.90222	6.50828	5.83697	5.92357	7.65885	7.45128	6.13398	5.99832	6.24525	6.3763	7.05511	5.9065	5.31674
hsa-miR-664a-3p	4.99123	3.39281	5.22939	2.87621	6.32113	5.21886	4.82874	4.16722	4.90574	5.64862	4.24175	3.57041	0	3.57672	5.13932	3.43303	4.67821	4.34119	3.78812	2.89084	2.78287	1.84675	5.3784	5.12633	5.04066	5.65021	3.84085	4.54892	4.62046	0	4.18214	4.94758	5.35407	3.18846	4.7667	4.67819	4.5803	3.50828	4.40996	4.6986	3.80087	3.17826	4.44948	4.37773	0	0.791336	3.93963	4.94126	4.37332
hsa-miR-664a-5p	2.7282	5.26728	4.78881	1.87621	4.4086	4.78823	3.78692	3.43025	5.07566	4.95794	2.65679	4.72795	2.88578	4.62253	5.61995	4.73259	5.23215	5.42461	4.8821	3.4758	4.51984	3.84675	4.57869	4.33783	4.97926	4.80775	3.99839	4.41964	2.62046	5.60842	4.18214	4.25952	5.09104	2.31399	3.38819	5.14767	4.03281	1.92332	4.2035	4.30741	3.21591	0	5.22709	4.14327	3.38726	3.3763	0	3.00838	2.99481
hsa-miR-671-3p	7.04531	7.89531	7.53605	7.04613	7.96499	8.72683	7.55121	7.30472	7.08896	7.10805	6.86624	7.97325	7.81651	8.16168	8.43586	7.84111	8.0275	8.1387	8.1017	7.50555	7.44584	5.93421	6.39366	7.639	7.94755	7.59362	8.17933	8.34445	7.84714	8.19338	6.62271	7.73705	8.09104	6.85831	7.84105	8.53425	7.27488	7.53803	7.82499	6.89237	6.42536	7.14789	7.44948	7.94455	6.87912	7.68615	6.93963	8.38815	7.14862
hsa-miR-6741-3p	4.14323	5.12977	4.60595	3.87621	4.64306	5.07202	4.90891	3.16722	4.90574	5.23358	3.65679	5.36182	4.2077	4.98008	6.06179	6.56548	5.37155	4.80686	4.13208	4.21276	2.78287	0	3.7307	4.13713	4.54316	4.47333	5.07114	6.07785	4.80809	4.123	3.37478	4.41153	4.64358	4.31399	4.52569	4.29968	4.6543	4.50828	2.37753	5.03488	4.53784	0	4.64213	5.44812	5.8467	4.8788	3.09164	5.1928	4.13232
hsa-miR-6772-3p	3.06923	4.6152	3.98146	2.87621	4.02157	4.40762	3.78692	3.16722	1.90574	3.12505	2.46414	4.26228	3.47074	4.98008	5.13932	5.19202	4.16801	4.1188	3.33561	3.89084	0	0	3.52425	3.59461	4.91513	2.53473	4.94776	3.9432	3.9741	0	0	3.48191	4.35407	3.31399	3.52569	3.97775	0	2.92332	3.9181	3.80294	0	0	3.22709	4.75624	3.38726	3.79134	2.35467	3.3563	4.13232
hsa-miR-6819-3p	4.97105	2.80784	4.25448	4.68356	3.12849	2.84963	3.28442	3.84529	4.96463	3.21252	3.65679	4.51382	3.88578	3.98008	4.61995	5.05451	5.12362	5.21566	3.57953	0	4.28537	4.43171	3.99373	3.20033	4.04066	4.4092	4.1848	3.5071	4.69846	0	1.37478	4.375	1.18415	3.81649	3.65122	2.56271	4.23926	1.92332	2.82499	4.15803	4.91635	0	4.10156	4.41336	2.38726	3.59869	5.41356	4.40693	4.76035
hsa-miR-6837-3p	3.52175	0	3.3965	3.87621	4.56906	3.53768	2.86938	5.01522	3.78021	0.125054	3.11622	3.57041	4.69313	3.08196	3.29802	4.86187	3.29355	4.92616	3.97032	4.21276	3.78287	5.30618	4.57869	3.62563	3.04066	3.11969	1.46233	3.41964	0	0	0	3.25952	0	2.72903	4.7667	4.10703	0	1.92332	4.59053	3.6986	2.21591	3.5933	2.96406	3.37773	4.19462	2.79134	0	3.45583	2.25785
hsa-miR-6842-3p	4.7755	5.50828	5.01121	5.33564	5.02157	6.03726	4.3999	4.43025	4.67833	4.95794	5.41168	5.15537	3.47074	5.39071	5.48124	4.86187	5.37155	5.53384	4.92057	3.89084	3.78287	4.16867	3.28324	5.09341	4.77762	5.47333	5.11769	4.0046	5.45054	6.2605	3.37478	5.0896	5.64358	3.72903	4.92424	4.43718	4.5803	5.50828	4.47269	4.99138	4.67534	4.5933	5.16569	5.32259	0	4.59869	5.09164	4.00838	3.25785
hsa-miR-6847-5p	2.14323	4.6152	3.78882	1.87621	2.9061	3.53768	3.86938	3.43025	2.90574	3.64862	0	4.45493	0	4.04879	3.80052	4.25615	4.64718	4.23428	2.17514	3.89084	4.1048	0	3.40877	2.65601	4.36259	2.75712	3.66397	3.0046	2.0355	5.80107	0	3.48191	3.9915	3.81649	3.38819	4.6216	4.6543	3.50828	3.9625	0.961635	0	0	3.44948	4.69966	4.38726	1.79134	2.35467	3.00838	3.84281
hsa-miR-6852-5p	6.79285	8.11163	6.96635	7.85349	7.16662	7.32716	7.23084	6.65265	6.65169	7.07342	7.12439	7.38567	7.47074	7.68052	8.26956	7.49414	7.77826	7.56359	7.63071	6.06076	7.16369	6.4906	6.60517	7.16644	7.73182	7.17859	7.71784	7.53338	6.89348	6.70796	6.7671	7.09522	7.57647	6.61167	7.64369	8.692	7.38765	6.92332	7.41795	6.76469	6.21591	5.29374	7.95501	7.67051	6.47473	7.16638	6.09164	7.75352	7.11583
hsa-miR-7-1-3p	5.17886	2.80784	4.04035	3.46117	4.12849	3.84963	3.28442	4.75218	3.4907	4.55132	3.56368	4.03989	0	3.37741	3.03498	3.05451	3.29355	1.94888	3.33561	5.89084	4.28537	5.30618	4.34737	3.35644	4.62562	4.53473	1.72537	3.58956	1.0355	0	4.54471	3.89695	4.88459	3.89895	3.38819	3.14767	1.91733	3.50828	3.8723	3.6986	5.38583	3.17826	2.96406	2.0558	0	0	3.09164	4.40693	3.48024
hsa-miR-744-5p	10.3127	11.5793	10.4619	10.8099	11.4277	10.9389	10.8731	11.0289	10.3073	10.7908	10.654	11.8664	10.8106	12.0938	12.3667	11.9692	12.3164	10.9333	11.2878	10.7643	11.0973	10.7202	9.96208	9.80871	11.7423	10.9582	11.7602	11.45	11.8169	10.4521	9.73233	10.4953	11.7915	10.0294	10.7218	11.7494	10.9145	10.5527	10.8488	10.235	10.0168	10.5933	11.143	12.1325	11.0981	11.5825	10.9459	11.3799	11.3497
hsa-miR-766-3p	5.84367	5.71473	5.90429	4.68356	5.67869	7.20718	4.82874	4.84529	5.7802	4.79748	5.04911	5.29623	4.88578	6.16168	6.75745	5.09014	6.23215	7.41648	6.0302	1.89084	5.55546	0	2.63116	6.29021	5.15613	5.1977	6.36922	4.5071	4.84285	0	1.37478	5.94758	4.88459	4.42947	3.06626	6.08627	4.85593	4.24525	4.44166	5.20956	0	0	4.81205	5.95062	4.38726	5.43519	0.769708	5.71887	4.76035
hsa-miR-769-5p	6.3759	6.97777	6.29131	6.52006	7.08932	7.31995	6.92828	6.75218	6.06224	6.59266	6.7336	5.99925	6.83997	7.03615	6.70174	6.3473	6.75298	6.80686	6.36381	6.13876	6.6073	5.93421	6.29954	6.37025	6.26305	7.2717	7.17933	7.03435	6.05045	7.15862	6.23276	6.48191	6.93904	5.81649	6.93663	7.32648	6.84016	6.56718	6.94047	6.3823	6.64217	6.5933	7.21198	7.20046	7.05969	7.2176	5.85717	6.64698	6.34531
hsa-miR-7706	4.46516	4.97777	3.64443	4.46117	4.9061	5.83957	3.94738	4.65265	3.84434	4.37298	5.46414	4.3294	4.88578	4.50517	4.94188	3.43303	4.95651	4.40831	4.78812	4.89084	5.51984	3.84675	4.778	4.6409	4.91513	5.1977	5.85465	4.17453	5.20542	5.123	4.95974	4.17706	4.50608	4.68323	4.87362	5.67819	5.88696	5.50828	5.22188	4.86853	5.80087	5.40066	4.34257	4.61039	6.19462	4.49178	5.5246	4.45584	4.84281
hsa-miR-7848-3p	1.99123	5.12977	1.3965	3.87621	3.9061	2.48706	3.3999	3.65265	3.40824	3.51737	4.11622	4.11789	2.88578	3.83198	3.57104	3.19202	4.07782	4.03634	2.17514	0	2.19791	0	2.99373	3.79896	2.45569	3.2717	2.31033	4.58956	3.45054	0	1.37478	3.41153	3.18415	4.05096	3.7667	3.83573	0	0	2.82499	3.07711	0	0	3.81205	1.37773	1.38726	0	2.35467	2.3563	3.25785
hsa-miR-7849-3p	3.95059	4.97777	4.30339	4.46117	5.17912	5.08909	4.90891	5.79949	4.4907	3.98304	4.74425	5.59789	4.69313	5.03192	4.77915	4.68678	5.27337	5.30643	4.08768	0	4.59023	4.16867	3.63116	3.92902	4.45569	4.47333	5.42581	4.22699	5.00512	0	4.83421	3.79004	5.18415	3.53639	5.42381	5.00012	4.50229	2.92332	5.08803	4.28356	4.80087	4.5933	5.54902	5.49875	0	4.3763	3.35467	5.16365	5.0652
hsa-miR-8058	3.14323	6.33141	2.71843	4.68356	5.02157	3.88916	3.86938	5.16722	4.60618	3.71002	4.82671	4.67732	5.97324	4.64489	3.71306	4.37644	3.70858	3.64932	3.84257	6.4144	5.19791	6.43171	6.18136	2.24097	5.84801	7.36762	5.48026	4.5071	4.57982	0	4.54471	3.25952	6.35407	4.72903	5.11066	5.04384	7.38765	5.62376	3.37753	3.93126	6.07389	6.63769	4.89006	5.20555	8.04548	7.16638	6.85717	4.50314	5.95829
hsa-miR-877-5p	7.75204	8.21724	8.11417	6.26852	7.57852	8.53613	8.17113	6.36885	7.95013	8.18305	4.94219	7.93066	8.31204	9.44907	10.8631	8.45369	10.0093	9.00009	8.2738	7.21276	6.82726	6.75364	7.35519	7.57089	7.97139	8.06351	8.31283	7.07069	7.7032	6.55595	7.94464	8.14759	8.3339	7.77342	6.4413	9.67819	7.71607	6.67821	7.46113	7.95976	6.07389	7.76322	6.52477	9.66221	7.47473	8.02974	7.35467	7.29714	6.92081
hsa-miR-889-3p	7.07397	7.0173	9.4693	8.26852	8.7432	6.81925	8.24249	7.20284	8.17564	8.11658	8.04049	6.49932	6.1337	6.90793	6.28291	6.90251	7.09516	7.93187	6.9363	5.4758	6.44584	6.84675	6.48202	6.35644	6.52178	6.73113	7.0946	5.92743	7.69846	7.90959	6.46224	6.31842	6.91207	8.7597	7.49253	8.90849	6.8081	7.17125	8.70927	7.14154	7.0488	5.76322	5.85158	7.01	4.70919	6.40605	5.85717	7.55457	6.78141
hsa-miR-9-5p	3.46516	4.6152	1.3965	1.87621	2.32113	3.7241	2.69946	2.84529	2.12813	3.03194	1.65679	3.19189	5.2077	3.79245	2.96098	2.73259	2.82406	4.47244	2.73154	0	3.00526	0	3.40877	4.2805	4.26305	2.94977	4.53272	4.12008	2.62046	0	2.95974	3.61316	4.18415	2.31399	4.38819	3.83573	4.13972	1.92332	3.9625	3.37667	3.53784	0	5.50011	3.37773	3.70919	2.3763	0	3.13391	1.67288
hsa-miR-92a-3p	16.3803	16.3505	15.9745	16.0086	16.2013	16.727	16.2383	16.1015	15.9375	16.1169	15.8644	16.3558	15.883	16.4355	16.6098	16.0991	16.1986	16.1759	16.525	16.5813	16.3383	16.8223	16.6513	16.2557	16.4225	16.2554	16.4417	16.1355	16.2015	16.403	16.3044	16.235	16.3911	16.1691	16.0768	16.5419	16.3436	16.2031	16.0443	16.1933	16.5872	16.7248	16.0998	16.4938	16.9201	16.5278	16.5423	16.2048	16.4187
hsa-miR-92b-3p	10.5691	11.1298	10.5801	10.728	10.3979	10.4287	10.3973	10.7095	10.5651	10.8307	11.1921	11.1438	11.6205	10.9385	10.5372	11.4425	10.6987	11.5527	11.2715	11.9556	10.8354	11.5032	11.5281	11.3651	10.572	11.5972	11.5988	11.3622	11.5528	11.9495	11.7746	11.0857	10.8932	10.9262	11.6671	11.2129	11.9704	10.9921	10.9926	10.9451	11.7483	11.793	11.2439	11.1973	11.2927	11.576	11.2434	11.3084	11.3794
hsa-miR-93-3p	3.62866	1.80784	4.48396	0	1.32113	3.13914	3.15889	2.43025	4.12813	3.87994	3.11622	2.67732	2.88578	3.14609	3.4135	0	3.87851	2.53384	0.895037	0	4.65734	3.84675	3.99373	3.92902	3.26305	0	1.46233	3.0046	2.90997	0	3.95974	3.94758	3.18415	3.63592	3.23619	1.7851	4.13972	3.50828	3.50306	4.18403	3.21591	2.5933	0.642128	2.9627	0	0	3.35467	3.13391	3.99481
hsa-miR-93-5p	11.7085	10.5493	10.3937	10.5308	10.476	10.722	10.4643	10.8773	10.645	10.724	10.8626	11.1379	10.8046	10.9938	10.9103	11.4178	11.1474	10.5918	11.037	11.9366	11.3123	12.4642	12.1135	10.7126	10.6639	10.4366	10.4522	11.0079	11.3163	10.6244	11.393	10.8701	10.9671	11.1024	10.5888	10.7163	11.3089	11.0629	10.8087	11.2766	12.0144	12.3974	10.7216	10.7871	11.7742	11.4813	11.7246	10.6911	11.3329
hsa-miR-937-3p	3.52175	0	1.98146	3.87621	0	2.26467	2.50681	1.84529	2.6427	1.93241	4.51477	2.67732	1.88578	2.79245	2.88298	3.19202	3.37155	4.23428	3.89504	5.21276	2.78287	5.16867	4.8682	2.15851	2.77762	5.23517	2.94776	3.81196	4.09439	5.123	4.54471	2.25952	4.50608	3.31399	3.87362	3.43718	4.13972	4.92332	3.37753	3.13156	4.21591	5.29374	3.22709	4.01	0	3.59869	3.35467	1.87087	4.25785
hsa-miR-941	8.18981	8.86313	7.98521	8.08566	7.99356	9.55929	8.29937	7.78781	8.55439	7.49138	8.37103	7.93066	7.24333	8.53542	7.67016	7.86187	8.00626	8.05479	8.90226	8.87952	7.95946	8.54719	8.72769	9.29625	8.10675	7.49666	8.48913	8.07785	8.2482	6.65905	8.65091	8.76379	8.59354	7.82706	8.22613	7.86953	7.75022	8.44688	7.74782	8.72429	8.29272	8.8317	7.57287	8.26282	7.26991	7.05812	7.78094	8.66008	7.96751
hsa-miR-942-5p	6.01113	4.6152	5.27914	4.68356	4.32113	4.82945	4.94738	4.65265	5.74704	4.90641	4.61099	4.19189	3.88578	3.94445	4.20491	4.63948	5.07782	4.70376	5.78812	4.4758	5.97927	6.37031	6.46766	5.17957	4.84801	5.07905	4.86833	5.46403	4.8768	2.80107	5.95974	5.51586	5.27161	5.87878	5.92424	5.04384	4.6543	6.31564	4.69946	5.79453	6.21591	5.05273	4.44948	5.30373	5.70919	4.11326	6.16203	5.27686	5.48024
hsa-miR-96-5p	6.8657	5.80784	3.64443	4.68356	1.9061	3.48706	3.3999	3.84529	4.74704	6.04392	4.11622	3.77686	4.88578	4.62253	2.71306	4.53994	4.21108	6.28873	4.48	5.21276	5.81262	7.4906	6.40877	3.39297	2.45569	6.15922	0	4.22699	4.94239	6.38603	6.41918	5.31842	6.18415	5.53639	5.65122	3.73264	2.6543	5.62376	5.04739	5.64346	7.57346	5.76322	5.22709	3.81069	4.55719	5.64932	5.8141	1.13391	4.99481
hsa-miR-98-3p	6.96086	5.71473	6.97393	6.39977	6.60654	5.70207	6.92828	6.91138	7.02121	6.44698	6.80654	6.29623	6.2077	5.48051	5.82158	6.66332	6.54989	7.03634	6.46706	6.4758	6.72147	6.30618	7.02348	6.85895	5.91513	6.59362	6.66397	6.82903	6.56948	7.35565	6.54471	6.94135	5.27161	7.31399	6.69562	6.07578	6.41983	6.01078	6.66629	7.41285	4.21591	5.84123	6.85158	5.92617	5.63519	5.83573	6.38442	6.24938	6.25785
hsa-miR-98-5p	11.8894	12.3615	12.7632	12.2149	12.5646	12.6266	12.0304	12.0127	12.0232	12.4845	12.0351	13.2816	12.6289	13.2458	13.6125	13.4539	14.1644	13.6346	13.563	11.2896	12.2265	11.5032	10.4595	12.8336	12.7231	12.2273	13.228	12.3363	12.9206	12.2512	10.7968	12.4286	12.9436	11.3588	12.8848	12.7873	12.2089	11.8029	12.7621	11.8208	11.2466	11.2533	13.1	13.2226	11.484	12.4805	11.5584	12.6476	12.1059
hsa-miR-99a-5p	7.83533	7.33141	6.72741	5.46117	6.47088	4.84963	5.78692	5.88969	7.10213	6.82549	6.79634	6.09879	6.0557	6.13032	4.5957	4.86187	5.61547	5.21566	4.93317	7.86812	6.67364	6.84675	8.04781	5.77148	5.97926	6.51962	5.26969	6.52816	6.07989	6.38603	8.71463	6.65184	6.22854	6.28362	5.42381	6.75911	5.54182	6.17125	6.31042	5.82788	6.83062	5.5933	5.72959	6.02159	7.19462	6.43519	7.12726	5.59334	6.55553
hsa-miR-99b-3p	3.90877	5.26728	4.15139	4.46117	4.71345	2.26467	3.94738	4.30472	2.78021	2.82549	3.74425	2.86997	3.47074	4.04879	3.80052	4.53994	4.48117	4.56359	4.37308	2.89084	3.00526	0	2.63116	4.29986	1.45569	4.2717	1.94776	4.06349	4.30852	5.123	3.69671	3.17706	3.76911	3.97696	1.65122	4.43718	4.23926	3.92332	4.24003	2.07711	0	0	2.22709	3.64077	0	2.3763	2.35467	5.00838	0
hsa-miR-99b-5p	11.773	12.7657	12.8355	12.1685	12.3414	11.2838	11.2449	10.7233	11.0242	11.4944	11.5444	11.6837	10.2389	12.5406	11.6382	11.134	12.1684	12.0951	12.0202	11.4006	10.8712	10.8496	10.9013	12.253	11.6443	12.2821	10.7117	10.8979	11.9189	13.2512	12.3937	11.7995	13.1499	12.0144	11.9992	11.5993	10.7311	10.7998	11.4609	10.4176	11.3695	10.1325	10.6407	11.6569	10.8177	10.6571	11.1631	12.3364	11.3974
[truncated: 7 more columns]
